# 1 Temporal metacognition as the decoding of self-generated brain dynamics

2  
3 Tadeusz W. Kononowicz<sup>1\*</sup>, Clémence Roger<sup>2</sup>, Virginie van Wassenhove<sup>1</sup>

4  
5 <sup>1</sup> Cognitive Neuroimaging Unit, CEA DRF/Joliot, INSERM, Université Paris-Sud, Université Paris-  
6 Saclay, NeuroSpin center, 91191 Gif/Yvette, France; <sup>2</sup> Université de Lille, CNRS, UMR 9193 -  
7 SCALab - Sciences Cognitives et Sciences Affectives, F-59000 Lille, France

8  
9 \* Corresponding authors:

10 Tadeusz W. Kononowicz

11 Tel.: +33(0)1.69.08.79.38

12 CEA DRF/Joliot, NeuroSpin - INSERM Cognitive Neuroimaging Unit

13 Bât 145 Point Courrier 156

14 Gif s/ Yvette F-91191 FRANCE

15 [t.w.kononowicz@icloud.com](mailto:t.w.kononowicz@icloud.com)

16  
17 Virginie van Wassenhove

18 [Virginie.van.Wassenhove@gmail.com](mailto:Virginie.van.Wassenhove@gmail.com)

19

20

## 21 SUMMARY

22

23 Metacognition, the ability to know about one's thought process, is self-referential. Here, we  
24 combined psychophysics and time-resolved neuroimaging to explore metacognitive inference on the  
25 accuracy of a self-generated behavior. Human participants generated a time interval and evaluated the  
26 signed magnitude of their temporal production. We show that both self-generation and self-evaluation  
27 relied on the power of beta oscillations ( $\beta$ ; 15-40 Hz) with increases in early  $\beta$  power predictive of  
28 increases in duration. We characterized the dynamics of  $\beta$  power in a low dimensional space ( $\beta$  state-  
29 space trajectories) as a function of timing and found that the more distinct trajectories, the more accurate  
30 metacognitive inferences were. These results suggest that  $\beta$  states instantiates an internal variable  
31 determining the fate of the timing network's trajectory, possibly as release from inhibition. Altogether,  
32 our study describes oscillatory mechanisms for timing, suggesting that temporal metacognition relies  
33 on inferential processes of self-generated dynamics.

34

35

## 36 AUTHOR CONTRIBUTIONS

37 V.W., C.R., and T.W.K. designed the research. C.R. and T.W.K. performed the experiments. T.W.K.  
38 and V.W. analyzed the data. T.W.K. and V.W. wrote the manuscript.

39

## 40 ACKNOWLEDGMENTS

41 This work was supported by an ERC-YStG-263584, an ANR10JCJC-1904, and an ANR-16-CE37-  
42 0004-04to V.vW. We thank the members of UNIACT and the medical staff at NeuroSpin for their  
43 help in recruiting and scheduling participants. We thank members of UNICOG for fruitful  
44 discussions. Preliminary data were presented at SFN (2012, Washington DC), SFN (2015,  
45 Washington DC) and TRF (2017, Strasbourg).

1  
2

## INTRODUCTION

3

4           Metacognition, the ability to introspect about one's cognitive state (Fleming & Dolan, 2012),  
5 has been little explored in the domain of time perception. Theories of psychological time do not  
6 currently account for metacognitive abilities although they are likely fundamental for fine-tuning  
7 endogenous timing mechanisms. The capacity to monitor and evaluate one's action involves some form  
8 of time estimation: for instance, we often monitor our timing for appropriate turn taking during  
9 conversations. During decision-making, several species can represent timing uncertainties derived from  
10 the temporal statistics of external sensory inputs (Mamassian, 2008; Balci et al, 2009; Jazayeri &  
11 Shadlen, 2010). Animals can self-monitor their timing (Meck et al., 1984) and humans can reliably  
12 judge their timing errors when reproducing a learned target duration (Akdogan & Balci, 2017; also see  
13 Miltner et al., 1997). A recent paper extended error monitoring to numerical errors (Duyan & Balci, in  
14 press) on the assumption of similar representational features across magnitudes (albeit see Martin et al.,  
15 2017). In fact, humans and mice seem to combine their uncertainty estimates of exogenous timing  
16 information with endogenous uncertainty regarding how well they performed on a timing task (Balci et  
17 al, 2009). Yet, it is unclear whether, in the absence of external timing contingencies provided by sensory  
18 stimuli, humans could introspect about timing behavior. In this study, we explored 'temporal  
19 metacognition' as a self-referential process enabling to render intelligible one's timing error given a  
20 task in which participants self-generated target durations in the absence of prior learning or sensory  
21 inputs.

22           We asked human participants to produce time intervals of 1.45 s, and to subsequently rate their  
23 produced interval on a continuous scale going from 'too short' to 'too long' (**Fig. 1**). In this temporal  
24 production task, participants self-initiated the time interval by button press (R1), and terminated it with  
25 a second button press when they considered that 1.45 s had elapsed. Participants had full volitional  
26 control over their time production in the absence of any sensory cues, which enabled to assess how  
27 internal timing become explicitly available to awareness through self-referential metacognition (Block,  
28 1995; Fleming et al., 2012). This experimental design also provided several paradigmatic and

1 conceptual benefits: first, the task requirements capitalized on forward-inverse models in motor  
2 execution (Miall & Wolpert, 1998) considering that the key variable for the motor goal was the timing  
3 of the second button press given *when* the first button press was realized. This internal variable could  
4 be set early during a trial, and used to guide motor trajectory of the second button press allowing the  
5 minimization of execution errors (Harris & Wolpert, 1998) *in time*. Second, the metacognitive  
6 assessment of the motor timing goal could parsimoniously rely on the availability of such internal  
7 variable coding for target duration. Hence, one working hypothesis was that the same internal variable  
8 would support temporal production (FOJ: first order judgment) and self-evaluation (SOJ: second order  
9 judgment) (Fleming et al., 2012).

10 Current neuroscientific models posit that internal dynamics in timing are mediated by  
11 oscillatory or state-dependent network dynamics (Laje & Buonomano, 2013; Buhusi & Meck, 2005;  
12 Merchant et al., 2013; Allman et al., 2014; Gu et al., 2015; van Wassenhove, 2016; Bueno et al., 2017).  
13 Participants were recorded with combined magneto- and electro-encephalography (MEG, EEG) while  
14 performing the task. We quantified the dynamics of oscillatory brain responses when they self-  
15 generated (FOJ) and self-evaluated (SOJ) the target duration. In the context of a two-staged timing  
16 model (van Wassenhove, 2009), and following a series of studies suggesting that duration may be coded  
17 by the power of beta ( $\beta$ ) oscillations (Kononowicz & Van Rijn, 2015; Kulashekhar et al., 2016; Wiener  
18 et al, 2018), we hypothesized that  $\beta$  oscillations may implement the internal variable coding for duration  
19 in the temporal production (FOJ) task. Additionally, we tested whether such internal variable could  
20 naturally provide an estimate of the under- or over-estimation of the FOJ for the metacognitive  
21 evaluation (SOJ).

22  
23 We report that participants reliably estimated the direction and the signed magnitude of their  
24 timing errors prior to receiving any feedback on the validity of their produced time interval. These  
25 results confirmed the ability to detect and estimate one's temporal errors during self-generated time  
26 production. Second, we describe several neural markers tracking participants' first and second order  
27 judgments: the power of  $\beta$  oscillations linearly related to the produced duration (FOJ) and non-linearly  
28 to metacognitive inference (SOJ). Crucially, the distance in  $\beta$  state-space informed on the reliability of

1 an individual's metacognitive inferences. Altogether, our findings provide novel evidence for the neural  
2 signatures of estimation of self-generated internal variables in motor timing.

3

#### 4 **METHODS**

5

##### 6 *Participants*

7

8 Nineteen right-handed volunteers (11 females, mean age: 24 years old) with no self-reported  
9 hearing/vision loss or neurological pathology were recruited for the experiment and received monetary  
10 compensation for their participation. Prior to the experiment, each participant provided a written  
11 informed consent in accordance with the Declaration of Helsinki (2008) and the Ethics Committee on  
12 Human Research at Neurospin (Gif-sur-Yvette). The data of seven participants were excluded from the  
13 analysis due to the absence of anatomical MRI, technical issues with the head positioning system during  
14 MEG acquisition, abnormal artifacts during MEG recordings, and two participants not finishing the  
15 experiment. These datasets were excluded *a priori* and were not visualized or inspected. Hence, the  
16 final sample comprised twelve participants (7 females, mean age: 24 y.o.). All but two participants  
17 performed six experimental blocks; the first block was removed for one participant due to excessive  
18 artifacts, the last block was removed for another participant who did not conform to the requirements  
19 of the task.

20

##### 21 *Stimuli and Procedure*

22

23 Before the MEG acquisitions, participants were explained they were taking part in a time  
24 estimation experiment, and written instructions were provided explaining all steps of the experimental  
25 protocol. In a given trial, the participant had to perform three successive steps: first, the participant  
26 produced a 1.45 s time interval; second, they self-estimated their time production as too short or too  
27 long as compared to the instructed time interval and third, they received feedback on their produced  
28 time interval (**Fig. 1a**). We will refer to the produced time interval as the first order temporal judgment

1 (FOJ), and to the self-evaluation of the first order judgment as second order temporal judgment (SOJ).  
2 The feedback participants received was for all trials in the 1<sup>st</sup> and in 4<sup>th</sup> experimental block, or on 15%  
3 of the trials in the other blocks (**Fig. 1a**). To tailor an accurate feedback for each individual, a perceptual  
4 threshold for duration discrimination of the same 1.45 s duration was collected before the experiment;  
5 this individual threshold was used to scale the spacing of the feedback categories as too short, correct  
6 or too long (**Fig. 1b**) as well as change the feedback unbeknownst of the participant in blocks 4 to 6.

7 Each trial started with the presentation of a fixation cross “+” on the screen indicating  
8 participants they could start whenever they decided to (**Fig. 1a**). The inter-trial interval ranged between  
9 1 s and 1.5 s. Participants initiated their production of the time interval with a brief but strong button  
10 press once they felt relaxed and ready to start. Once they estimated that a 1.45 s interval had elapsed,  
11 they terminated the interval by another brief button press. To initiate and terminate their time production  
12 (FOJ) participants were asked to press the top button on Fiber Optic Response Pad (FORP, Science Plus  
13 Group, DE) using their right thumb (**Fig. 1b**). The “+” was removed from the screen during the  
14 estimation of the time interval to avoid any sensory cue or confounding responses in brain activity  
15 related to the FOJ. Following the production of the time interval, participants were asked to self-estimate  
16 their time estimation (second order judgment; **Fig 1b**). For this, participants were provided with a scale  
17 displayed on the screen 0.4 s after the keypress that terminated the produced time interval. Participants  
18 could move a cursor continuously using the yellow and green FORP buttons (**Fig. 1b**). Participants  
19 were instructed to place the cursor according to how close they thought their FOJ was with respect to  
20 the instructed target interval indicated by the sign ‘~’ placed in the middle of the scale. Participants  
21 placed the cursor to indicate whether they considered their produced time interval to be too short (‘--’,  
22 left side of the scale) or too long (‘++’, right side of the scale). Participants were instructed to take as  
23 much time as needed to be accurate in their SOJ and there was no time limit imposed on participants.

24 Following the completion of the SOJ, participants received feedback displayed on a scale  
25 identical to the one used for SOJ. The row of five symbols indicated the length of the just produced FOJ  
26 (**Fig. 1a**). The feedback range was set to the value of the perceptual threshold estimated on a per (mean  
27 population threshold = 0.223 s, SD = 0.111 s). A near correct FOJ yielded the middle ‘~’ symbol to turn

1 green; a too short or too long FOJ turned the symbols ‘-’ or ‘+’ orange, respectively (**Fig. 1b**); a FOJ  
2 that exceeded these categories turned the symbols ‘- -’ or ‘++’ red. In Block 1 and 4, feedback was  
3 provided in all trials; in Block 2, 3, 5 and 6, feedback was randomly assigned to 15% of the trials (**Fig.**  
4 **1a**). From Block 4 on, and unbeknownst to participants, the target duration was increased to  $1.45 +$   
5  $(individual\ threshold/2)$ ; mean population duration = 1.56 s). In Block 1 and 4, participants had to  
6 produce 100 trials; in Block 2, 3, 5, and 6, participants produced 118 trials. Between the experimental  
7 blocks, participants were reminded to produce the target duration of 1.45 s as accurately as possible and  
8 to maximize the number of correct trials in each block.

9

#### 10 *Estimation of temporal discrimination threshold*

11

12 The psychoacoustics toolbox was used to calculate the temporal discrimination threshold for each  
13 participant (Soranzo & Grassi, 2014) by adapting the available routine  
14 “DurationDiscriminationPureTone” provided in the toolbox. An adaptive procedure was chosen using  
15 a staircase method with a two-down one-up rule, and stopped after twelve reversals (Levitt, 1971). For  
16 each trial, three identical tones of 1 kHz were presented to the participant. One of the tones lasted longer  
17 than 1.45 sec (deviant tone) while the other 2 tones lasted precisely 1.45 sec (standard tones). The  
18 position of the deviant tone changed randomly across trials. The task was to identify the deviant tone  
19 and to give its position in the sequence. Tones were provided by earphones binaurally. The value of the  
20 correct category was set as  $target\ duration \pm (threshold/3)$ , the lower and upper limit values were set  
21 as  $target\ duration \pm (2 * individual\ threshold/3)$ . These values were used to provide feedback to  
22 participants.

23

#### 24 *Simultaneous M/EEG recordings*

25

26 The experiment was conducted in a dimly-lit, standard magnetically-shielded room located at  
27 Neurospin (CEA/DRF) in Gif-sur-Yvette. Participants sat in an armchair with eyes open looking at a

1 screen used to show visual stimuli using a projector located outside of the magnetically shielded room.  
2 Participants were asked to respond by pushing a button on a FORP response pad (Science Plus Group,  
3 DE) held in their right hand. Electromagnetic brain activity was recorded using the whole-head Elekta  
4 Neuromag Vector View 306 MEG system (Neuromag Elekta LTD, Helsinki) equipped with 102 triple-  
5 sensors elements (two orthogonal planar gradiometers, and one magnetometer per sensor location) and  
6 the 64 native EEG system using Ag-AgCl electrodes (EasyCap, Germany) with impedances below 15  
7 k $\Omega$ . Participants were seated in upright position and their head position was measured before each block  
8 using four head-position coils placed over the frontal and the mastoid areas. The four head-position  
9 coils and three additional fiducial points (nasion, left and right pre-auricular areas) were used during  
10 digitization to help with co-registration of the individual's anatomical MRI. MEG and EEG (M/EEG)  
11 recordings were sampled at 1 kHz and band-pass filtered between 0.03 Hz and 330 Hz. The electro-  
12 oculograms (EOG, horizontal and vertical eye movements), -cardiograms (ECG), and -myograms  
13 (EMG) were recorded simultaneously with MEG. EMG recordings were taken from the *flexor pollicis*  
14 *brevis*, which is involved in the thumb flexion. A pair of surface bipolar electrodes were placed on the  
15 surface of right thumb (*thenar eminence*) on right hand of each subjects approximately 5 mm apart. The  
16 head position with respect to the MEG sensors was measured using coils attached to the scalp. The  
17 locations of the coils and EEG electrodes were digitized with respect to three anatomical landmarks  
18 using a 3D digitizer (Polhemus, US/Canada). Stimuli were presented using a PC running Psychtoolbox  
19 software (Brainard, 1997) that has been executed in Matlab environment.

20

21

## 22 **Data Analysis**

23

### 24 *M/EEG data preprocessing*

25

26 Signal Space Separation (SSS) was applied to decrease the impact of external noise on recorded  
27 brain signals (Taulu & Simola, 2006). SSS correction, head movement compensation, and bad channel

1 rejection was done using MaxFilter Software (Elekta Neuromag). Trials containing excessive ocular  
2 artifacts, movement artifacts, amplifier saturation, or SQUID artifacts were automatically rejected using  
3 rejection criterion applied on magnetometers ( $55e^{-12}$  T/m) and on EEG channels ( $250e^{-6}$  V). Trial  
4 rejection was performed using epochs ranging from - 0.8 s to 2.5 s following the first press initiating  
5 the time production trial. Eye blinks, heart-beats, and muscle artifacts were corrected using Independent  
6 Component Analysis (Bell & Sejnowski, 1995) with mne-python. Baseline correction was applied using  
7 the mean value ranging from -0.3 s to -0.1 s before the first key press.

8 Preprocessed M/EEG data were then analyzed using MNE Python 0.14 (Gramfort et al., 2014)  
9 and custom written Python code. For time-domain evoked response analysis, a low-pass zero phase lag  
10 FIR filter (40 Hz) was applied to raw M/EEG data. For time frequency analyses, raw data were filtered  
11 using a double-pass bandpass FIR filter (0.8 – 160 Hz). The high-pass cutoff was added to remove slow  
12 trends which could lead to instabilities in time frequency analyses. To reduce the dimensionality, all  
13 evoked and time-frequency analyses were performed on virtual sensor data combining magnetometers  
14 and gradiometers into single MEG sensor types using ‘*as\_type*’ method from MNE-Python 0.14 for  
15 gradiometers. This procedure largely simplified visualization and statistical analysis without losing  
16 information provided by all types of MEG sensors (gradiometers and magnetometers).

17 EMG data were filtered with FIR filter (20 - 200 Hz) and rectified, following standard EMG  
18 assessment. Similarly to ERF procedures, baseline correction was applied using the mean value ranging  
19 from -0.3 s to -0.1 s before the first or the second key press. Artifacts were automatically rejected using  
20 rejection criterion applied on EMG channel ( $2e^{-2}$  V).

21

## 22 *M/EEG-aMRI coregistration*

23

24 Anatomical Magnetic Resonance Imaging (aMRI) was used to provide high-resolution  
25 structural images of each individual’s brain. The anatomical MRI was recorded using a 3-T Siemens  
26 Trio MRI scanner. Parameters of the sequence were: voxel size: 1.0 x 1.0 x 1.1 mm; acquisition time:  
27 466s; repetition time TR = 2300 ms; and echo time TE= 2.98 ms. Volumetric segmentation of



1 participants' anatomical MRI and cortical surface reconstruction was performed with the FreeSurfer  
2 software (<http://surfer.nmr.mgh.harvard.edu/>). A multi-echo FLASH pulse sequence with two flip  
3 angles (5 and 30 degrees) was also acquired (Jovicich et al., 2006; Fischl et al., 2004) to improve co-  
4 registration between EEG and aMRI. These procedures were used for group analysis with the MNE  
5 suite software (Gramfort et al., 2014). The co-registration of the M/EEG data with the individual's  
6 structural MRI was carried out by realigning the digitized fiducial points with MRI slices. Using  
7 `mne_analyze` within the MNE suite, digitized fiducial points were aligned manually with the  
8 multimodal markers on the automatically extracted scalp of the participant. To insure reliable  
9 coregistration, an iterative refinement procedure was used to realign all digitized points with the  
10 individual's scalp.

11

#### 12 *MEG source reconstruction*

13

14 Individual forward solutions for all source locations located on the cortical sheet were  
15 computed using a 3-layers boundary element model (BEM) constrained by the individual's aMRI.  
16 Cortical surfaces extracted with FreeSurfer were sub-sampled to 10,242 equally spaced sources on each  
17 hemisphere (3.1 mm between sources). The noise covariance matrix for each individual was estimated  
18 from the baseline activity of all trials and all conditions. The forward solution, the noise covariance and  
19 source covariance matrices were used to calculate the dSPM estimates (Dale et al., 2000). The inverse  
20 computation was done using a loose orientation constraint (loose = 0.4, depth = 0.8) on the radial  
21 component of the signal. Individuals' current source estimates were registered on the FreeSurfer average  
22 brain for surface based analysis and visualization.

23

#### 24 *ERF/P analysis*

25

26 The analyses of evoked-related fields (ERF) and potentials (ERP) with MEG and EEG,  
27 respectively, focused on the quantification of the amplitude of slow evoked components using non-

1 parametric cluster-based permutation tests which control for multiple comparisons (Maris &  
2 Oostenveld, 2007). This analysis combined all sensors and electrodes into the analysis without  
3 predefining a particular subset of electrodes or sensors, allowing to keep the set of MEG and EEG data  
4 as similar and consistent as possible. We used a period ranging from 0.3 s to 0.1 s before the first press  
5 as a baseline. For the ERF/P analysis the data were low-pass filtered using 40 Hz FIR filter.

### 6 7 *Time-frequency analysis*

8  
9 To analyze the oscillatory power in different frequency bands using cluster based permutation,  
10 we used DPSS tapers with an adaptive time window of  $frequency/2$  cycles per frequency in 4 ms steps  
11 for frequencies ranging from 3 to 100 Hz, using '*tfr\_multitaper*' function from MNE-Python. The time  
12 bandwidth for frequency smoothing was set to 2. To receive the desired frequency smoothing, the time  
13 bandwidth was divided by the time window defined by the number of cycles. For example, for 10 Hz  
14 frequency time bandwidth was  $2/0.5$ , resulting in 4 Hz smoothing. We used a time window ranging  
15 from 0.3 s to 0.1 s before the first press as baseline. Statistical analyses were performed on theta (3-7  
16 Hz), alpha (8-14 Hz), beta ( $\beta$ : 15-40 Hz), and gamma bands (41-100 Hz) submitted to spatiotemporal  
17 cluster permutation tests in the same way as for evoked response analyses. Both time-frequency and  
18 power spectral density (PSD) estimates were computed using discrete spheroidal sequences tapers  
19 (Slepian, 1978). PSD estimates were computed in 1 Hz steps.

20 To analyze the oscillatory power in  $\beta$  frequency (15-40 Hz) on single trials, we used Morlet  
21 wavelets as implemented in the '*single\_trial\_power*' from MNE-Python with 5 cycles per frequency in  
22 4 ms steps. We chose this parameter to capture only the initial  $\beta$  power elicited by the first button press  
23 and not the following preparatory brain responses to the second button press. We used a period ranging  
24 from 0.3 s to 0.1 s before the first press as baseline.

### 25 26 *Cluster based statistical analysis of MEG and EEG data*

27

1 Cluster-based analyses identified significant clusters of neighboring electrodes or sensors in the  
2 millisecond time scale. To assess the differences between the experimental conditions as defined by  
3 behavioral outcomes, we ran cluster-based permutation analysis (Maris & Oostenveld, 2007), as  
4 implemented by MNE-Python by drawing 1000 samples for the Monte Carlo approximation and using  
5 FieldTrip's default neighbor templates. The randomization method identified the MEG virtual sensors  
6 and the EEG electrodes whose statistics exceeded a critical value. Neighboring sensors exceeding the  
7 critical value were considered as belonging to a significant cluster. The cluster level statistic was defined  
8 as the sum of values of a given statistical test in a given cluster, and was compared to a null distribution  
9 created by randomizing the data between conditions across multiple participants. The p-value was  
10 estimated based on the proportion of the randomizations exceeding the observed maximum cluster-level  
11 test statistic. Only clusters with corrected p-value  $< 0.05$  are reported. For visualization, we have chosen  
12 to plot the MEG sensor or the EEG electrode of the significant cluster, with the highest statistical power.

13

#### 14 *Binning procedure of behavioral and neuroimaging data*

15

16 All cluster-based analyses were performed on three experimentally-driven conditions defined  
17 on the basis of either the objective performance in time production (FOJ: short, correct, long) or the  
18 subjective self-evaluation (SOJ: short, correct, long) separately for each experimental block. Before the  
19 binning procedure the behavioral data were z-scored on peer block basis to keep the trial count even in  
20 each category. Additionally, computing these three conditions within a block focused the analysis on  
21 local variations of brain activity as a function of objective or subjective performance. Additionally, to  
22 overcome limitations of arbitrary binning, and to capitalize on the continuous performance naturally  
23 provided by the time production and time self-evaluation tasks, we also used a single trial approach,  
24 which allowed the investigation of interactions between the first and second order terms.

25

#### 26 *Generalized additive mixed models analysis*

27

1           To analyze single trial data we used generalized additive mixed models (Wood, 2017; GAMM).  
2 Detailed discussions on the GAMM method can be found in elsewhere (Wood, 2017). Here, we briefly  
3 introduce the main advantages and overall approach of the method. GAMMs are an extension of the  
4 generalized linear regression model in which non-linear terms can be modeled jointly. They are more  
5 flexible than simple linear regression models as they do not require that a non-linear function be  
6 specified and the specific shape of the non-linear function (i.e. smooth) is determined automatically.  
7 Specifically, the non-linearities are modeled by so-called basis functions that consist of several low-  
8 level functions (linear, quadratic, etc.). We have chosen GAMMs as they can estimate the relationship  
9 between multiple predictors and the dependent variable using a non-linear smooth function. The  
10 appropriate degrees of freedom and overfitting concerns are addressed through cross-validation  
11 procedures. Importantly, interactions between two nonlinear predictors can be modeled as well. In that  
12 case, the fitted function takes a form of a plane consisting of two predictors. Mathematically, this is  
13 accomplished by modeling tensor product smooths. Here, we used thin plate regression splines as it  
14 seemed most appropriate for large data sets and flexible fitting (Wood, 2003). In all presented analyses,  
15 we used a maximum likelihood method for smooth parameter optimization (Wood, 2011). Besides F  
16 and p values computed using Wald test (Wood, 2012), the Supplementary tables contain the information  
17 on the estimated degrees of freedom (edf). Edf values can be interpreted as how much a given variable  
18 is smoothed. Although, higher edf values indicate more complex splines, all tested models showed  
19 linear splines (edf = 1), depicted in the plotted model outcomes in associated figures.

20           GAMM analyses were performed using the *mgcv* R package (Wood, 2009, version 1.8.12).  
21 GAMM results were plotted using the *itsadug* R package (Van Rij et al., 2016, version 1.0.1).

22

### 23 *Behavioral data analysis using generalized additive mixed models*

24

25 The analysis of behavioral data was performed as in the GAMMs framework as fully described below  
26 in the *Single-trial analysis of MEG and EEG data using generalized additive mixed models*, unless  
27 stated otherwise in the Results section. Each model was fitted with participant as a random factor. For

1 the Block analysis, Block was included as a fixed factor. For the analysis of metacognitive inference,  
2 FOJ was entered as a continuous predictor of SOJ. The validity of the smooth term was assessed for  
3 FOJ using a relative model comparison performed using Akaike Information Criterion (AIC) and  $\chi^2$   
4 test.

#### 6 *Single-trial analysis of MEG and EEG data using generalized additive mixed models*

8 Although not widely used, GAMMs have been proven useful for modeling EEG data (Tremblay  
9 & Newman, 2015). Contrary to some of the previous studies using GAMMs for modeling of  
10 multidimensional electrophysiological data, sensors were not included as fixed effects. Rather, we took  
11 a more conservative approach and fitted the same model for every sensor separately. The resulting p-  
12 values were then corrected for multiple comparisons using false discovery rate (FDR) correction  
13 (Genovese et al., 2002). For plotting purposes, we collapsed the data across significant sensors after  
14 FDR correction and refitted the model.

15 The fitted GAMMs contained random effects term for participant and fixed effects that were  
16 based on theoretical predictions. Specifically, the full model had the following specification:  
17  $uV/Tesla/power \sim FOJ + SOJ + SOJ\ accuracy + FOJ*SOJ + FOJ*SOJ\ accuracy$ . Besides the random  
18 term for participants, the model contained smooth terms for the first and second order judgments, *SOJ*  
19 *accuracy* between the first and second order judgment, and the interaction term between *FOJ* and *SOJ*  
20 *accuracy*. Notably, FOJ, SOJ and other predictors were entered as continuous variables in GAMM  
21 analyses as opposed to post-hoc experimental conditions which suffered limitations from choosing  
22 arbitrary split point in the data.

23 Although GAMMs have built-in regularization procedures (meaning that they are somewhat  
24 inherently resistant against multicollinearity), multicollinearity can be assessed using variance  
25 inflation factor (VIF; *fmsb* R package, version 0.5.2). Here, VIF were assessed for the final model and  
26 consisted in averaging data from multiple sensors collapsed over a particular variable at hand. None of  
27 the VIF values exceeded 1.1, indicating that multicollinearity was unlikely to have had a major influence

1 on the reported findings. Note that Rogerson (2001) recommended maximum VIF value of 5 and the  
2 author of *fmsb* recommended value of 10.

3 Before entering empirical variables in the model, we calculated normalized values or z-scores:  
4 trials in which a given variable deviated more than 3 z-scores were removed from further analysis. This  
5 normalization was computed separately for every MEG sensor and every EEG electrode. For single-  
6 trial analyses of  $\beta$  power in FOJ, we focused on the maximum power within the 0.4 s to 0.8 s period  
7 following the first button press. This time window overlapped with the selected time window that was  
8 used in cluster analyses. The main difference for the width of the time window is that we used one  
9 value for the GAMM and hence insured we capture only the  $\beta$  power elicited by the first button press  
10 and not spurious preparatory brain responses to the second button press.

11

### 12 *Linear mixed model analysis of $\beta$ state space and metacognitive inference*

13

14 As described above, the  $\beta$  state space was estimated on per block and per participant basis. As  
15 splitting the data per block and per individual could inflate the degrees of freedom, we used linear  
16 mixed-effects models (e.g., Pinheiro and Bates, 2000; Gelman and Hill, 2007) which, by default,  
17 accounted for individual, multiple per subject observations in the data. Linear mixed-effects models are  
18 regression models that model the data by taking into consideration multiple levels. Subjects and blocks  
19 were entered in the model as random effects that were allowed to vary in their intercept. P-values were  
20 calculated based on a Type-3 ANOVA with Satterthwaite approximation of degrees of freedom, using  
21 *lmerTest* package in R (Kuznetsowa et al., 2017). The mixed-effects models approach was combined  
22 with model comparison that allowed evaluating the best fitting model in a systematic manner.

23

### 24 *Demixed Principal Component Analysis (dPCA)*

25

26 To extract patterns in different frequency bands of averaged brain activity over experimental  
27 conditions, we used dPCA analysis (Kobak et al., 2016). Although, dPCA is commonly used in the

1 population analysis of single cell recordings we apply it to collection of sensors, something that is  
2 analogical to population of neurons with mixed selectivities. Detailed discussions and proofs of the  
3 dPCA method can be found elsewhere (Kobak et al., 2016). In brief, dPCA aims to find a decomposition  
4 of the data into latent components that are easily interpretable with experimental conditions, preserving  
5 the original data to a maximal extent. The method compresses the data but also demixes dependencies  
6 on measured quantity of the task parameters. dPCA is essentially driven by a trade-off between  
7 demixing and compression, thus is a mixture of ordinary PCA and linear discriminant analysis (LDA):  
8 PCA aims at determining a projection of the data that optimally separates conditions and LDA aims at  
9 determining a projection of the data which minimizes the reconstruction error between the projections  
10 and the original data. All analyses were performed using a *Python* version of the *dPCA* module  
11 (<https://github.com/machenslab/dPCA>). To prevent overfitting, we used a regularization procedure to  
12 find the optimal  $\lambda$  parameter for our dataset, and used a 20-fold cross-validation. We focused dPCA  
13 analyses on the two first components (dPCA 1 and dPCA 2) of the  $\beta$  oscillatory activity because they  
14 explained on average 73% (SD= 20%) and 26% (SD= 20%) of the overall variance, respectively.  
15 Multidimensional distance was quantified as Euclidean distance for both dPCA analysis and for per-  
16 sensor analysis.

17

### 18 *Robust regression of MEG and EEG data*

19

20 Robust regression is an alternative to least squares regression when data have outliers or  
21 influential observations. It is also an alternative to Spearman's correlation when a more complex model  
22 has to be built. Model comparisons were performed using robust F test. All analyses were performed  
23 using *robust* R package (Wang et al., 2017, version 0.4-18).

24

## 25 **RESULTS**

26

1 We first provide behavioral evidence showing that participants can accurately perform a self-  
2 generated temporal production (FOJ), and access its precision (SOJ). We then quantified oscillatory  
3 signatures of FOJ, and explored the idea of a two-staged process serving metacognitive inferences  
4 (SOJ). Our analytical approach used statistical modeling of single-trial data, and dimensionality  
5 reduction methods for M/EEG data.

6

7 *Drifting time production (FOJ) over time with no loss of precision*

8

9 In the course of the experiment, participants ( $n = 12$ ) accurately produced the 1.45 s target  
10 interval (Blocks 1-3) and the adjusted 1.56 s intervals (Blocks 4-6: feedback was implicitly and  
11 individually adjusted to a new target value; cf. Methods) as depicted in the density function over FOJ  
12 (**Fig. 2a**). As can be seen in **Fig. 2b**, the increase of FOJ was steady and progressive over the course of  
13 the entire experiment. Given the serial task structure, the consecutive changes in feedback (for implicit  
14 target durations) co-occurred with an unexpected drift of participants' duration estimation: in the 100%  
15 feedback blocks (Blocks 1 and 4), time intervals were accurately produced with a mean of 1.490 s and  
16 1.582 s, respectively (**Fig. 2a**). In the 15% feedback blocks (Blocks 2, 3 and 5, 6), the length of the FOJ  
17 significantly increased (**Fig. 2a**; dashed lines). This was tested by adding the feedback factor in a  
18 Generalized Additive Mixed Model (Wood, 2017; GAMM), allowing testing the statistical  
19 dependencies on single-trial basis. In these 15% feedback blocks, participants' temporal productions  
20 were significantly longer for the 1.45 s target interval (**Fig 2a**;  $T(8.0) = 11.3, p < 10^{-15}$ ; +90 ms on  
21 average) and for the 1.56 s adjusted interval ( $T(7.6) = 10.4, p < 10^{-15}$ ; +78 ms). This suggested a natural  
22 tendency of participants to lengthen their time estimates over time when receiving less feedback.  
23 However, the blocks providing less feedback (Blocks 2, 3 and 5, 6) systematically occurred after the  
24 100% feedback blocks (Blocks 1 and 4, respectively). Hence, although the amount of feedback was the  
25 sole factor to be warranted in the models containing the intercept (1.45 s target:  $\Delta\text{AIC} = 123, \chi^2(1.0) =$   
26  $6084832, p < 10^{-15}$ ; adjusted 1.56 s interval:  $\Delta\text{AIC} = 104, \chi^2(0.9) = 4500629, p < 10^{-15}$ ), we could not  
27 disentangle with full certainty the time-on-task effect, and the specific feedback effects.



1           Nevertheless, additional evidence strongly suggested that the amount of feedback was not the  
2 main contributor for the observed drift in time estimation (**Fig 2b**). For instance, to assess the possibility  
3 of a step-like transition between Block 3 (explicit 1.45s target) and 4 (implicit adjusted 1.56s target),  
4 we used the last 10 trials of Block 3 and the first 10 trials of Block 4. The transition trials from Block 3  
5 and 4 did not significantly differ (**Fig. 2c**;  $F(1) = 0.6, p > 0.1$ ) suggesting no clear behavioral transition  
6 when the feedback was implicitly changed, even when provided on every single trial (Block 4).

7           Additionally, given the lengthening of FOJ, we tested whether the precision of time production  
8 changed in the course of the experiment. If so, it could have indicated that participants were not  
9 performing the task with consistent attentional focus over time, or had changed their cognitive strategy  
10 when feedback was implicitly changed. We measured the standard deviation per block and found that,  
11 in spite of the drift, the precision of FOJ did not significantly differ across blocks as tested by repeated  
12 measures ANOVA ( $F(5, 65) = 0.7, p = 0.634$ ). The stability of behavioral precision throughout the  
13 experiment indicated that participants were performing the task as required and that the role of feedback  
14 in the task performance was not predominant.

15           It is thus noteworthy that, despite not explicitly informing participants about the change in  
16 target duration introduced in Blocks 4, 5, and 6, participants readily adjusted their temporal production  
17 (FOJ) without any loss in the precision of their temporal production (**Fig. 2c**). This observation  
18 suggested that humans can implicitly monitor their temporal criterion as previously shown in rats (Meck  
19 et al., 1984).

20  
21           We then asked whether humans could monitor such internal criterion explicitly, as suggested  
22 by recent work (Akdogan & Balci, 2017). For this, participants had to introspect about their produced  
23 duration (SOJ). Due to the progressive lengthening of FOJ across experimental blocks, the behavioral  
24 data were z-scored separately for each block to allow exploiting and analyzing the local variations in  
25 single-trial estimates without any confounding influence of time-on-task effects.

26

27 *Behavioral evidence for metacognitive inference in time estimation*

1

2           Individuals could estimate and track their FOJ over time (**Fig. 2d, e**, respectively). To  
3 understand how precisely participants could do so, we assessed whether the metacognitive inferences  
4 (SOJ) were predictive of self-generated temporal production (FOJ) on a single-trial basis using a  
5 Generalized Additive Mixed Model (Wood, 2017; GAMM), which can accommodate nonlinear  
6 predictors and interactions. FOJ and SOJ were strongly correlated on a trial-by-trial basis (**Fig. 2f**,  
7  $F(4.0) = 192.5$ ,  $edf = 4.0$ ,  $p < 10^{-15}$ ), suggesting that participants could correctly assess the signed error  
8 magnitude of the just produced target duration. Additionally, the model fit revealed a nonlinearity in  
9 the regression slope between FOJ and SOJ (**Fig. 2f**). This nonlinear term was modeled using a flexible  
10 nonlinear spline term provided by GAMM (cf. Methods) and was compared to the model allowing only  
11 linear terms ( $\Delta AIC = 15.5$ ,  $\chi^2(4.6) = 18576$ ,  $p < 0.001$ ). This nonlinearity indicated that the correlation  
12 was slightly less steep for the FOJ intervals close to the target duration, and steeper for FOJ away from  
13 the target duration. Hence, this pattern indicated that FOJ closest to the internal target duration criterion  
14 were harder to self-estimate (SOJ). A consistent pattern was also observed in brain activity and will be  
15 reported later on.

16           We then asked whether the SOJ effect resulted from a sequential effect due to the feedback  
17 delivered on the previous trial. To test this, we fitted the model adding the factor 'FOJ on n-1 trial' as a  
18 fixed effect. The analysis was constrained to blocks with 100% feedback (Block 1 and 4) so that all  
19 trials - but the first one - were effectively preceded by feedback. The model comparison showed a  
20 marginal trend towards an n-1 duration effect ( $\Delta AIC = 0.9$ ,  $\chi^2(1.0) = 2135$ ,  $p = 0.091$ ), suggesting that  
21 the longer the previous FOJ was, the shorter the current SOJ tended to be ( $F(1.0) = 2.9$ ,  $edf = 1.0$ ,  $p =$   
22  $0.09$ ). The trend towards sequential effect in duration production was suggestive of implicit monitoring  
23 in humans in line with previous studies (Meck et al., 1984; Meck 1988) showing that rats' anticipatory  
24 behavior was negatively correlated with response times in the previous trial. Nevertheless, on a trial-  
25 by-trial basis, the strongest statistical relationship we observed was between FOJ and SOJ ( $F(1.0) =$   
26  $293.2$ ,  $edf = 1.0$ ,  $p < 10^{-15}$ ), suggesting that human participants most exclusively based their self-  
27 evaluation (SOJ) on the current trial estimation.

1 An additional scenario accounting for the interaction between FOJ and SOJ was that  
2 participants intentionally increased the variance of their FOJ to improve their SOJ. This cognitive  
3 strategy would confound the possibility of an internal state variable being monitored; this possibility  
4 could also be an issue in previous work (Akdogan & Balci, 2017). To address this possible confound,  
5 we performed a control experiment in which we manipulated the incentives and showed that participants  
6 effectively complied with the goal of inferring the signed magnitude of their temporal errors as per task  
7 requirements (**Fig. S1a. Control behavioral experiment**).

8 To sum up, our behavioral findings indicated that participants produced temporal targets with  
9 overall constant precision in the course of the experiment, and that timing errors during temporal  
10 production could be assessed through metacognitive inference. We then tested the working hypothesis  
11 that the neural markers of the internal variable coding for the target duration may support both first and  
12 second order judgments. For this, we analyzed the M/EEG data recorded while participants underwent  
13 the behavioral task.

14

15  *$\beta$  power as a state variable for FOJ*

16

17 Following the initiation of a production trial (R1), we observed a significant cluster of  $\beta$  power  
18 in both EEG and MEG activity ( $p = 0.020$ ;  $p = 0.043$ ; respectively; 0.4-1.2s after R1, **Fig. 3a; Fig.**  
19 **S2ab. Slow brain activity does not encode duration**). When sorting the data according to FOJ, we  
20 observed that stronger  $\beta$  power was associated with longer durations (**Fig. 3a**). To overcome the sorting  
21 of brain activity as a function of arbitrary FOJ bins, we also used FOJ as a continuous predictor in a  
22 single trial analysis (GAMM). This analysis confirmed that longer durations elicited larger  $\beta$  power in  
23 a large cluster of sensors (**Fig. 3b, Table S1**) with likeliest neural generators located in bilateral motor  
24 and midline cortices (**Fig. 3a**). No other oscillatory responses showed significant changes as a function  
25 of temporal production (FOJ,  $p > 0.1$ ).

26 Crucially, FOJ did not correlate with EMG activity (**Fig. S3**,  $p > 0.1$ ) or with duration press  
27 (measured between the button press and its release) ( $p > 0.1$ , GAMM), thereby excluding the

1 contribution of low-level factors to the  $\beta$  power effects observed here and which could have confounded  
2 the role of  $\beta$  oscillations in time estimation reported in previous work (Kononowicz & Van Rijn, 2015).

3         Nevertheless, we also considered that  $\beta$  power may have been directly related to motor  
4 preparation, and not to timing *per se*. Previous research has shown that changes in  $\beta$  power correlated  
5 with latency changes caused by the directional uncertainty of motor responses (Tzagarakis, et al., 2010).  
6 Here, no changes in direction were necessary as the same button was used to initiate and terminate the  
7 target duration, and no other variables than internal timing was required by the task. An alternative  
8 hypothesis was that  $\beta$  power changes were a marker of a drift-like accumulation (Simen et al., 2011),  
9 so that the peak latency of  $\beta$  power *preceding* the second button press (R2) would differ across produced  
10 durations. Such latency differences would predict that, at a given latency near the second button press,  
11  $\beta$  power would significantly differ across produced durations. To test this possible confound, we fitted  
12 the GAMM to the mean values of  $\beta$  power locked to the second button press (0.4 s before the second  
13 button press). None of the fitted model terms were significant after FDR correction in either MEG or  
14 EEG data (**Fig. S4**), providing no substantial evidence for the contribution of motor preparation or  
15 accumulation-like processes in the fluctuations of  $\beta$  power.

16

17         These results replicated and strengthened the causal implication of  $\beta$  oscillations in duration  
18 estimation (Kononowicz & Van Rijn, 2015; Kulashekar et al., 2016; Wiener et al., 2018), here in a  
19 motor production task. Covariation of  $\beta$  power with FOJ indicated that this internal timing variable may  
20 contribute to the uncertainty of the “*when*” in motor execution. This result is consistent with reports of  
21  $\beta$  power in motor execution tasks controlling for higher level variables (Tan et al., 2016) and the  
22 fluctuations of  $\beta$  power as a function of predictability in motor timing (Fujioka et al, 2012; Meijer et  
23 al., 2016; Tzagarakis, et al., 2010). Across many studies (e.g., Bartolo et al., 2014; Kononowicz & Van  
24 Rijn, 2015; Meijer et al., 2016),  $\beta$  power systematically reached significance ~500 ms following the  
25 onset of a timed interval as was also seen here following R1 (**Fig. 3a**); the increase in  $\beta$  power continued  
26 thereafter. This pattern suggested the possibility of an early separation of distinct brain states that would

1 be predictive of distinct timing goals inferred during metacognitive evaluation. To explore how  $\beta$  power  
2 could be used for metacognitive inference, we assessed the relation between  $\beta$  power, FOJ and SOJ.

3

#### 4 *Non-linear use of $\beta$ power in metacognitive inference*

5

6 One working hypothesis was that the availability of an internal variable coding for duration  
7 may be shared by FOJ and SOJ. We thus asked whether  $\beta$  power varied as a function of SOJ. However,  
8 the analysis of  $\beta$  power showed no significant clusters, whether splitting SOJ in categories (**Fig. S5**, all  
9  $p > 0.1$ ) or using SOJ as a continuous predictor in a GAMM ( $p > 0.1$ ). We then reasoned that  $\beta$  power  
10 may only be a relevant indicator of SOJ when participants accurately self-estimated their temporal  
11 production. To test this, we defined an accuracy score for SOJ as the absolute difference score between  
12 FOJ and SOJ. We inverted the scale such that a high SOJ accuracy score indicated that the participant's  
13 metacognitive inference was close to his or her actual temporal production. The full GAMM model  
14 allowing non-linear terms had the following specification:  $\beta \text{ power} \sim \text{FOJ} + \text{SOJ} + \text{SOJ accuracy} +$   
15  $\text{FOJ}*\text{SOJ} + \text{FOJ}*\text{SOJ accuracy}$ . FOJ, SOJ, and other predictors were continuous variables (cf.  
16 Methods). Although the main term SOJ accuracy and the interaction between FOJ and SOJ showed no  
17 significant clusters, the interaction between FOJ and SOJ accuracy revealed a significant change of  $\beta$   
18 power in selected sensors (**Fig. 4, Table S2**). The nonlinear interaction between FOJ and SOJ accuracy  
19 was significant as compared to a model that did not include this interaction term (**Fig. 4**;  $\Delta\text{AIC} = 14.0$   
20  $\chi^2(2.1) = 9.6, p < 0.001$ ). In sum, the use of GAMM showed that  $\beta$  power was non-linearly related to  
21 SOJ accuracy with increased  $\beta$  power for trials in which participants provided an accurate metacognitive  
22 inference on their temporal production, *i.e.*, when participants were aware of the direction and of the  
23 magnitude of their time errors. The weakened association between  $\beta$  power and temporal production  
24 suggested that, on trials with lower SOJ accuracy, the internal variable manifested by  $\beta$  power was more  
25 difficult to discriminate. In other words, trials with a distinctive pattern of  $\beta$  power should be more  
26 accurately discriminated, an observation consistent with the non-linearities reported in our behavioral  
27 results.

1

2           In light of the relation between FOJ and SOJ accuracy, we thus hypothesized that participants  
3 may have access to the internal variable manifested by  $\beta$  power. More distant states of the internal  
4 variable would allow more accurate read-out. Therefore, under this working hypothesis, the more  
5 distant  $\beta$  power trajectories in the state space, the better metacognitive judgments may be. This was also  
6 suggested by our behavioral results (**Fig. 2f**) in which SOJ closest to the FOJ were harder to self-  
7 estimate. In light of the non-linearities between FOJ and SOJ and our initial working hypothesis of a  
8 common internal variable for FOJ and SOJ, we next aimed to provide a finer assessment of  $\beta$  power.  
9 For this, we projected the dynamics of  $\beta$  power into a lower dimensional space using dPCA (Machens,  
10 2010; Kobak et al., 2016) and quantified the distance in this defined ‘ $\beta$  state space’ as a function of  
11 FOJ. We specifically asked whether the distinctiveness of  $\beta$  power trajectories was a good predictor of  
12 metacognitive inference.

13

#### 14 *Distance in $\beta$ state space predicts metacognitive inference*

15

16           To project dynamics of  $\beta$  power into lower dimensional state-space with the dPCA method, we  
17 used the average power in  $\beta$  band for each individual and each block and across all sensors (from -0.3  
18 to 1.2 s after R1) (Machens, 2010; Kobak et al., 2016). The same approach was used in the *per* individual  
19 analyses (**Fig. S6**). Although the dPCA method was designed for single neuron populations, we used it  
20 here across sensors, with sensors homologous to a population of neurons with mixed selectivity. We  
21 looked at the morphology of the two first demixed Principal Components (dPC1 and dPC2; cf. Methods)  
22 which showed that  $\beta$  power rose fast at the onset of the FOJ, and remained segregated in different  
23 locations of the state-space (**Fig. 5a**). This pattern is illustrated by plotting the first two dPCs for two  
24 example blocks differing in the extent of their state-space separation (**Fig. 5a**, and example subjects  
25 **Fig. S6a**). The early separation pattern was found for nearly all participants in the study (**Fig. S6b**) with  
26 an apparent inter-individual variability in the magnitude of the separation in  $\beta$  power state-space (**Fig.**  
27 **S6c**).

1 To investigate the relationship between distance in  $\beta$  state-space and metacognitive inference,  
2 we then employed two approaches: a single trial-like analysis and an analysis over participants. We  
3 utilized the mean distance computed for each triplets of samples (too short, correct and too long).

4 We performed a *per* participant and *per* block analysis using linear mixed models, with subject  
5 and block as random effects (*cf.* Methods). We tested whether dPC1 predicted metacognitive inference  
6 and found that the degree of  $\beta$  state space separation significantly predicted metacognitive inferences  
7 [ $t(65) = 2.7, p = 0.009$ ] (**Fig. 5b**), indicating that the bigger the distance between the FOJ, the better the  
8 metacognitive inference was. For instance, the sample block framed in dark orange (**Fig. 5a, right panel**)  
9 showed a much larger spread of their  $\beta$  state-space (**Fig. 5b**) along with higher metacognitive inference  
10 accuracies (**Fig. 5b**). Conversely, the individual framed in light orange (**Fig. 5a, left panel**) showed a  
11 much smaller spread of their  $\beta$  state-space (**Fig. 5b**) and lower metacognitive inference accuracies (**Fig.**  
12 **5c**).

13 The left and right panels plot the empirical values of metacognitive inference against the  
14 empirical dPC1 values and the values predicted by the model on the basis of dPC1, respectively. The  
15 same analysis quantified on each sensor confirmed this pattern (**Fig. 5c**).

16 Importantly, we addressed the possibility that alternations of performance precision, which  
17 could drive  $\beta$  power, did not rule out the impact of  $\beta$  state-space in metacognitive inference. Thus we  
18 insured that the fluctuations in precision (CV) could not account for these observations (**Fig. S7.  $\beta$  state-**  
19 **space was not driven by Coefficient of Variation (Analysis per participant)**). In line with the control  
20 behavioral experiment, this analysis confirmed that alternations of performance precision did not rule  
21 out the role of  $\beta$  state-space in metacognitive inference.

22 To test the reliability of these observations, we performed a second similar analysis *per*  
23 participant. We quantified metacognitive inference as the correlation (Spearman's *rho*) between FOJ  
24 and SOJ on a per individual basis. We found a significant correlation between distance in  $\beta$  state-space  
25 (FOJ: 'short', 'correct', 'long') and the individual's metacognitive inference ( $rho = 0.75, p = 0.005$ ;  
26 **Fig. S6c left panel**). We insured that (i) the multidimensional distance in  $\beta$  state-space was not driven  
27 by the spread of individual FOJ responses as quantified by their Coefficient of Variation (CV, **Fig. S8a,**

1  **$\beta$  state-space was not driven by Coefficient of Variation (Analysis per participant)**), and (ii) that  
2 no other frequency bands or components were significantly related to metacognitive inference (**Fig. S8**  
3 **b-c**). To strengthen the outcomes of the dPCA analysis, we also quantified the Euclidean distance in  $\beta$   
4 power separately, for each sensor. With this method, the estimated distance in  $\beta$  space for a cluster of  
5 sensors also significantly correlated with metacognitive inference (**Fig. S6c, right panel**).

6 Lastly, to elucidate the dynamics of the  $\beta$  state-space distance and metacognitive inference, we  
7 fitted the mixed model predicting metacognitive inference on the basis of dPC1 for each time sample  
8 and observed that the predictability of the model monotonically increased over time (**Fig. 5d**). Notably,  
9 the build-up already started at the initiation of the interval and evolved as a stable trajectory over time,  
10 indicating the separation between the  $\beta$  state space trajectories and their contribution to metacognitive  
11 inference.

12  
13 To sum up, we showed that the larger the distance in  $\beta$  state space, the more accurate the  
14 metacognitive inference within participants, and on *a per* individual basis. In other words, trials with a  
15 more distinctive pattern of  $\beta$  activity were associated with more accurate metacognitive judgments. **This**  
16 **naturally suggests that the distinctiveness of  $\beta$  pattern supports its read-out**. The  $\beta$  state-space analysis  
17 provided strong evidence that the distance in  $\beta$  state-space could support temporal metacognition by  
18 providing a second order estimation of FOJ. The distance in  $\beta$  state-space may reflect a capacity for  
19 metacognitive inference of temporal estimation, akin to retrospectively monitoring and reading-out the  
20 state of the implicated  $\beta$  network.

## 23 **DISCUSSION**

24  
25 Using a newly designed temporal metacognition task with time-resolved neuroimaging and  
26 statistical modeling, we investigated how the human brain monitors its self-generated timing. We report  
27 several main findings: first, humans can maintain their precision of temporal production over time



1 despite implicit changes and drifts in mean duration values (FOJ). Second, human participants can  
2 accurately self-evaluate the signed error magnitude of their temporal productions (SOJ). Third, the  
3 power of  $\beta$  oscillatory activity following the initiation of the time interval was an accurate predictor of  
4 FOJ, even more so when participants were aware of their time-errors (SOJ). Intriguingly, the distance  
5 or distinctiveness in  $\beta$  state-space separating the self-generated time intervals was indicative of the  
6 accuracy with which timing performance could be inferred. Altogether, we interpret our findings as  
7 supporting the availability of an internal state variable coding for duration, which sets up the goal for a  
8 state-dependent trajectory in time production. Our results support the view that metacognitive  
9 inferences would consist in the reading out – or the decoding – of internal state variables, consistent  
10 with a recent proposal (Fleming & Daw, 2017). In the context of our task, this may possibly rely on  
11 forward-inverse models of state-dependent computations in motor systems (Harris & Wolpert, 1998).  
12 Below, we review and discuss the main evidence supporting this viewpoint along with the limitations  
13 of the current study.

14

### 15 *$\beta$ power as a marker of state variable coding for duration*

16 We hypothesized an internal state variable informing *when* the second button press should be  
17 made given the first button press was made. The post-movement rebound of  $\beta$  oscillations has seminally  
18 been proposed to reflect the idling state of motor cortices (Pfurtscheller et al., 1996), possibly sensitive  
19 to sensory afferents (Casimi et al., 2001). The observation that the power of  $\beta$  oscillations post-  
20 movement was stronger (smaller) for longer (shorter) timed intervals was consistent with the notion  
21 that the strength of network inhibition or idling would be predictive of the produced time interval (FOJ).  
22 In another words, the stronger the inhibition, the longer the time delay before the next button press.

23 However, consistent with recent studies indicating that active cognitive components are  
24 encoded in the  $\beta$  rebound (Tan et al., 2016), we discuss why  $\beta$  power is not trivially relating to a passive  
25 rebound. *First*, we found no significant impact of simultaneous EMG, providing no evidence for the  
26 implication of the strength or afferent feedback confounded with time production. *Second*, the  
27 variability in  $\beta$  power did not reflect random variance in time production (or explicit variance induced

1 by the participant, cf. control experiment), but the actual time interval that participants were  
2 subsequently aware of. In fact, our results suggested that  $\beta$  power was even more telling of an  
3 individual's FOJ when participants correctly self-estimated their FOJ (SOJ). Considering that  $\beta$  power  
4 reflects the amount of inhibition in a network (Whittington et al., 2000; Wang, 2010),  $\beta$  power *de facto*  
5 provides an estimation of the time delay before the network converges to a desired state, which, in our  
6 context, corresponds to the next movement - consistent with general motor inhibition schemes (Duque  
7 et al., 2017). *Additionally*, that the power of  $\beta$  oscillations determines the duration of network inhibition  
8 (**Fig. 6**) is consistent with the implication of  $\beta$  oscillations in predictive timing (Arnal & Giraud, 2012)  
9 and with the notion of an idle state until network updating or reorganization (Engel & Fries, 2010;  
10 Spitzer & Haegens, 2017). The power of  $\beta$  has been repeatedly shown to reflect explicit time estimation  
11 and prediction (Kononowicz & Van Rijn, 2015; Fujioka et al., 2010; Wiener et al, 2018) not only in  
12 motor timing (Bartolo et al., 2015) but also in perceptual duration estimations (Kulashekhar et al., 2015;  
13 Spitzer et al., 2014). Hence, we suggest that, because the power of  $\beta$  oscillations is indicative of the  
14 strength of inhibition in the network, it also naturally provides a state-dependent variable, which could  
15 be used as a duration code.

16

### 17 *Network inhibition and distance in $\beta$ state space support metacognitive inference*

18

19 Here, we expand on the notion of inhibition and show how it accounts for two crucial results  
20 on temporal metacognition. First,  $\beta$  power was non-linearly related to SOJ with increased  $\beta$  power for  
21 trials in which participants provided an accurate metacognitive inference. Second, in the state-space  
22 analysis, the more distinct the  $\beta$  state-space trajectories of FOJ categories were, the better participants  
23 were at self-evaluating their time errors. The notion of the strength of inhibition departs away from the  
24 notion that time estimation relies on the accumulation of sensory or internal evidence (Hardy &  
25 Buonomano, 2016; Kononowicz & Penney, 2016; Kononowicz & van Rijn, 2015; van Wassenhove,  
26 2016). The state-variable hypothesis rather suggests that, by indicating the amount of inhibition in the  
27 network,  $\beta$  power inherently determines the trajectory that the network will subsequently follow (**Fig.**

1 6). Hence, the initial state variable associated with the amount of  $\beta$  power may be sufficient to predict  
2 the over- or under-duration production, and this was essentially captured by the positive covariation  
3 between FOJ and  $\beta$  power in our study. The state variable would be predictive of the cascade of neural  
4 events leading to the next volitional button press (**Fig. 6**). What we consider to be the state variable  
5 could be formalized as initial inputs into a network, or initial network conditions in the case of a time  
6 production task, whose magnitude could control the speed (hence, timing) of the evolution of the  
7 system, very much in line with a recent proposal (Wang et al., 2017). By analogy to the  $\beta$  power results,  
8 the initial input specifies the position of the initial and final states of the system. Future studies should  
9 explore the link between network speed control and  $\beta$  oscillations at the global scale. With respect to  
10 the behavioral outcomes, the second press would result from the initial trajectory with limited revisions  
11 - or vetoing - shortly before the course of the next action (Schultze-Kraft et al., 2016). Until reaching  
12 the state in which the motor plan for the second button press is initialized, the distance in  $\beta$  space would  
13 thus reflect the discriminability of state-dependent variable encoding duration and availability for read  
14 out, that a decoder or a reader may estimate. That is, the more ‘too short’ trajectory moves away from  
15 ‘too long’ trajectory, the likely it is that the resulting duration will be accurately classified. Essentially,  
16 we propose that a reader can access the state variable, measured by  $\beta$  power, which determines the fate  
17 (trajectory) of network state.

18

## 19 *Conclusions*

20

21 We showed that the dynamics of  $\beta$  oscillations in the human brain not only predict the self-  
22 generation of time intervals but also the metacognitive inferences on their accuracy. Specifically, the  
23 distinctiveness of  $\beta$  power trajectories during timing was indicative of metacognitive inference. Our  
24 results suggest that network inhibition ( $\beta$  power) instantiates a state variable determining the fate of  
25 network trajectory, thus providing a natural code for duration. However, the question remains why one  
26 does not correct their ongoing interval production to reduce errors. Future studies will investigate which  
27 properties of internally generated representations could be accessible for conscious read out in order to  
28 address which mechanisms may support the reading out and the interpretation of the contingencies in

1 the first order network (Cleeremans et al., 2007; Denève et al., 1999; Dayan & Abbott, 2001; Pouget et  
2 al., 1998), and whether these mechanisms would be similar to those allowing to read out neural signals  
3 that encode primary sensory variables (Komura et al., 2013).

4

5

6

7

8

9 **References:**

10 Akdogan B, Balci F. 2017. Are you early or late?: Temporal error monitoring. *J Exp Psychol: Gen.* 146:  
11 347-361.

12 Arnal LH, Giraud AL. 2012. Cortical oscillations and sensory predictions. *Trends Cogn Sci.* 16:390-  
13 398.

14 Allman MJ, Teki S, Griffiths TD, Meck WH. 2014. Properties of the internal clock: First-and second-  
15 order principles of subjective time. *Annu Rev of Psychol.* 65:743-771.

16 Balci F, Freestone D, Gallistel CR. 2009. Risk assessment in man and mouse. *Proc Natl Acad Sci USA,*  
17 106:2459-2463.

18 Bartolo R, Prado L, Merchant H. 2014. Information processing in the primate basal ganglia during  
19 sensory-guided and internally driven rhythmic tapping. *J Neurosci,* 34:3910-3923.

20 Bell AJ, Sejnowski TJ. 1995. An information-maximization approach to blind separation and blind  
21 deconvolution. *Neural Comput.* 7:1129-1159.

22 Block N. 1995. On a confusion about a function of consciousness. *Behav Brain Sci.* 18:227-247.

23 Brainard DH. 1997. The psychophysics toolbox. *Spat Vis.* 10:433-436.

24 Bueno FD, Morita VC, de Camargo RY, Reyes MB, Caetano MS, Cravo AM. 2017. Dynamic  
25 representation of time in brain states. *Scientific Reports.* 7.

26 Buhusi CV, Meck WH. 2005. What makes us tick? Functional and neural mechanisms of interval  
27 timing. *Nat Rev Neurosci.* 6:755-765.

- 1 Buonomano DV, Maass W. 2009. State-dependent computations: Spatiotemporal processing in cortical  
2 networks. *Nat Rev Neurosci.* 10:113-125.
- 3 Cassim F, Szurhaj W, Sediri H, Devos D, Bourriez J, Poirot I, . . . Guieu J. (2000). Brief and sustained  
4 movements: Differences in event-related (de)synchronization (ERD/ERS) patterns. *Clin*  
5 *Neurophysiol.* 111:2032-2039.
- 6 Cleeremans A, Timmermans B, Pasquali A. 2007. Consciousness and metarepresentation: A  
7 computational sketch. *Neural Netw.* 20:1032-1039.
- 8 Dale AM, Liu AK, Fischl BR, Buckner RL, Belliveau JW, Lewine JD, Halgren E. 2000. Dynamic  
9 statistical parametric mapping: Combining fmri and MEG for high-resolution imaging of cortical  
10 activity. *Neuron*, 26:55-67.
- 11 Dayan P, Abbott LF. 2001. *Theoretical neuroscience* (Vol. 806). Cambridge, MA: MIT Press.
- 12 Denève S, Latham PE, Pouget A. 1999. Reading population codes: A neural implementation of ideal  
13 observers. *Nat Neurosci.* 2:740-745.
- 14 Duque J, Greenhouse I, Labruna L, Ivry RB. 2017. Physiological markers of motor inhibition during  
15 human behavior. *Trends in Neurosci.* 40:219-236.
- 16 Duyan AY, Balcı F. (in press). Numerical Error Monitoring. *Psychon Bull Rev.*  
17 <https://doi.org/10.3758/s13423-018-1506-x>
- 18 Engel AK, Fries P. 2010. Beta-band oscillations signalling the status quo? *Curr Opin Neurobiol*, 20:156-  
19 165.
- 20 Fleming SM, Dolan RJ. 2012. The neural basis of metacognitive ability. *Phil Trans R Soc B.* 367:1338-  
21 1349.
- 22 Fleming SM, Dolan RJ, Frith CD. 2012. Metacognition: Computation, biology and function. *Phil Trans*  
23 *R Soc B*, 367:1280-1286.
- 24 Fleming SM, Daw ND. 2017. Self-evaluation of decision-making: A general bayesian framework for  
25 metacognitive computation. *Psychol Rev.* 124:91-114.
- 26 Fleming SM, Weil RS, Nagy Z, Dolan RJ, Rees G. 2010. Relating introspective accuracy to individual  
27 differences in brain structure. *Science.* 329:1541-1543.

- 1 Fischl B, Salat DH, van der Kouwe AJ, Makris N, Ségonne F, Quinn BT, Dale AM. 2004. Sequence-  
2 independent segmentation of magnetic resonance images. *Neuroimage*. 23:69-84.
- 3 Fujioka T, Zendel BR, Ross B. 2010. Endogenous neuromagnetic activity for mental hierarchy of  
4 timing. *J Neurosci*. 30:3458-3466.
- 5 Genovese CR, Lazar NA, Nichols T. 2002. Thresholding of statistical maps in functional neuroimaging  
6 using the false discovery rate. *Neuroimage*. 15:870-878.
- 7 Gramfort A, Luessi M, Larson E, Engemann DA, Strohmeier D, Brodbeck C, Parkkonen L, Hämäläinen  
8 MS. 2014. MNE software for processing MEG and EEG data. *NeuroImage*. 86:446-460.
- 9 Gu BM, van Rijn H, Meck WH. 2015. Oscillatory multiplexing of neural population codes for interval  
10 timing and working memory. *Neurosci Biobeh Rev*. 48:160-185.
- 11 Hardy NF, Buonomano DV. 2016. Neurocomputational models of interval and pattern timing. *Curr*  
12 *Opin Behav Sci*. 8:250-257.
- 13 Harris CM, Wolpert DM. 1998. Signal-dependent noise determines motor planning. *Nature*. 394:780-  
14 784.
- 15 Holroyd CB, Coles MG. 2002. The neural basis of human error processing: Reinforcement learning,  
16 dopamine, and the error-related negativity. *Psychol Rev* 109:679-709.
- 17 Jazayeri M, Shadlen MN. 2010. Temporal context calibrates interval timing. *Nat Neurosci* 13:1020-  
18 1026.
- 19 Jovicich J, Czanner S, Greve D, Haley E, van der Kouwe A, Gollub R, . . . MacFall J. 2006. Reliability  
20 in multi-site structural MRI studies: Effects of gradient non-linearity correction on phantom and  
21 human data. *Neuroimage*. 30:436-443.
- 22 Kobak D, Brendel W, Constantinidis C, Feierstein CE, Kepecs A, Mainen ZF, . . . Machens CK. 2016.  
23 Demixed principal component analysis of neural population data. *ELife*. 5:e10989.
- 24 Komura Y, Nikkuni A, Hirashima N, Uetake T, Miyamoto A. 2013. Responses of pulvinar neurons  
25 reflect a subject's confidence in visual categorization. *Nat Neurosci*, 16:749-755.
- 26 Kononowicz TW, van Rijn H. 2015. Single trial  $\beta$  oscillations index time estimation. *Neuropsychologia*.  
27 75:381-389.

- 1 Kononowicz TW, Van Rijn H. 2011. Slow potentials in time estimation: The role of temporal  
2 accumulation and habituation. *Front Integr Neurosci.* 5:48.
- 3 Kononowicz TW, Penney TB. 2016. The contingent negative variation (CNV): Timing isn't everything.  
4 *Curr Opin Behav Sci.* 8:231-237.
- 5 Kononowicz TW, van Rijn H. 2014. Decoupling interval timing and climbing neural activity: A  
6 dissociation between CNV and N1P2 amplitudes. *J Neurosci.* 34:2931-2939.
- 7 Kulashekhar S, Pekkola J, Palva JM, Palva S. 2016. The role of cortical beta oscillations in time  
8 estimation. *Hum Brain Map.* 37:3262-3281.
- 9 Laje R, Buonomano DV. 2013. Robust timing and motor patterns by taming chaos in recurrent neural  
10 networks. *Nat Neurosci.* 16:925-933.
- 11 Levitt HCCH. 1971. Transformed up-down methods in psychoacoustics. *Journal Acoust Soc Am.*  
12 49:467-477.
- 13 Machens CK. 2010. Demixing population activity in higher cortical areas. *Front Comp Neurosci.* 4:126.
- 14 Mamassian P. 2008. Overconfidence in an objective anticipatory motor task. *Psychol Sci.* 19:601-606.
- 15 Maris E, Oostenveld R. 2007. Nonparametric statistical testing of eeg-and meg-data. *J Neurosc*  
16 *Methods.* 164:177-190.
- 17 Martin B, Wiener M, van Wassenhove V. 2017. A Bayesian perspective on accumulation in  
18 the magnitude system. *Sci Rep.* 7:630.
- 19 McCurdy LY, Maniscalco B, Metcalfe J, Liu KY, de Lange FP, Lau H. 2013. Anatomical coupling  
20 between distinct metacognitive systems for memory and visual perception. *J Neurosci.* 33:1897-  
21 1906.
- 22 Meck WH, Komeily-Zadeh FN, Church RM. 1984. Two-step acquisition: Modification of an internal  
23 clock's criterion. *J Exp Psychol: Animal Beh Processes.* 10:297.
- 24 Meck WH. 1988. Hippocampal function is required for feedback control of an internal clock's criterion.  
25 *Behav Neurosci.* 102:54.
- 26 Meijer D, Te EW, Praamstra P. 2016. Timing of beta oscillatory synchronization and temporal  
27 prediction of upcoming stimuli. *NeuroImage,* 138:233-241.

- 1 Merchant H, Harrington DL, Meck WH. 2013. Neural basis of the perception and estimation of time.  
2 Ann Rev Neurosci. 36:313-336.
- 3 Miall RC, Wolpert DM. 1996. Forward models for physiological motor control. Neural Netw. 9:1265-  
4 1279.
- 5 Miltner WHR, Braun CH, Coles MGH. 1997. Event-related brain potentials following incorrect  
6 feedback in a time-estimation task: Evidence for a generic neural system for error detection. J  
7 Cogn Neurosci. 9:788-798.
- 8 Pfurtscheller G, Stancák A, Neuper C. 1996. Event-related synchronization (ERS) in the alpha band--  
9 an electrophysiological correlate of cortical idling: A review. Int J Psychophysiol. 24:39-46.
- 10 Pouget A, Zhang K, Deneve S, Latham PE. 1998. Statistically efficient estimation using population  
11 coding. Neural Comput. 10:373-401.
- 12 Rogerson P. 2001. Statistical methods for geography. Sage.
- 13 Schultze-Kraft M, Birman D, Rusconi M, Allefeld C, Görden K, Dähne S, . . . Haynes JD. 2016. The  
14 point of no return in vetoing self-initiated movements. Proc Natl Acad Sci USA, 113:1080-1085.
- 15 Simen P, Balcı F, deSouza L, Holmes P, Cohen JD. 2011. A model of interval timing by neural  
16 integration. J Neurosci. 31:9238-9253.
- 17 Slepian D. 1978. Prolate spheroidal wave functions, fourier analysis, and uncertainty: The discrete case.  
18 Bell Sys Tech J, 57:1371-1430.
- 19 Soranzo A, Grassi M. 2014. PSYCHOACOUSTICS: a comprehensive MATLAB toolbox for auditory  
20 testing. Front Psychol. 5:712.
- 21 Spitzer B, Gloel M, Schmidt TT, Blankenburg F. 2013. Working memory coding of analog stimulus  
22 properties in the human prefrontal cortex. Cereb Cortex. 24:2229-2236.
- 23 Spitzer B, Haegens S. 2017. Beyond the status quo: A role for beta oscillations in endogenous content  
24 (re-) activation. ENeuro. ENEURO-0170.
- 25 Tan H, Wade C, Brown P. 2016. Post-movement beta activity in sensorimotor cortex indexes  
26 confidence in the estimations from internal models. J Neurosci. 36:1516-1528.
- 27 Taulu S, Simola J. 2006. Spatiotemporal signal space separation method for rejecting nearby



- 1 interference in MEG measurements. *Phys Med Biol*. 51:1759-1769.
- 2 Tremblay A, Newman AJ. 2015. Modeling nonlinear relationships in ERP data using mixed-effects  
3 regression with R examples. *Psychophysiology*. 52:124-139.
- 4 Tzagarakis C, Ince NF, Leuthold AC, Pellizzer G. 2010. Beta-band activity during motor planning  
5 reflects response uncertainty. *J Neurosci*. 30:11270-11277.
- 6 Ullsperger M, Fischer AG, Nigbur R, Endrass T. 2014. Neural mechanisms and temporal dynamics of  
7 performance monitoring. *Trends Cogn Sci*. 18:259-267.
- 8 Van Rij J, Wieling M, Baayen RH, van Rijn H. 2016 Package ‘itsadug’. Retrieved on June 13, 2017,  
9 from <http://cran.r-project.org/web/packages/itsadug/itsadug.pdf>
- 10 Van Rijn H, Kononowicz TW, Meck WH, Ng KK, Penney TB. 2011. Contingent negative variation  
11 and its relation to time estimation: A theoretical evaluation. *Front Integr Neurosci*, 5:91.
- 12 van Wassenhove V. 2009. Minding time in an amodal representational space. *Philos Trans R Soc B:*  
13 *Biol Sci*. 364:1815-1830.
- 14 van Wassenhove, V. 2016. Temporal cognition and neural oscillations. *Curr Opin Behav Sci*. 8:124-  
15 130.
- 16 Wang XJ. 2010. Neurophysiological and computational principles of cortical rhythms in cognition.  
17 *Physiol Rev*. 90:1195-1268.
- 18 Wang J, Zamar R, Marazzi A, Yohai V, Salibian-Barrera M, Maronna K, Zivot E, Rocke D, Martin D,  
19 Maechler M, Konis K. 2017. Package ‘robust’. Retrieved on August 1, 2017, from  
20 <https://CRAN.R-project.org/package=robust>
- 21 Whittington MA, Traub RD, Kopell N, Ermentrout B, Buhl EH. 2000. Inhibition-based rhythms:  
22 Experimental and mathematical observations on network dynamics. *Int J Psychophysiol*. 38:315-  
23 336.
- 24 Wood S. 2017. *Generalized additive models: An introduction with R*. CRC press.
- 25 Wood SN. 2012. On p-values for smooth components of an extended generalized additive model.  
26 *Biometrika*, 100:221-228.
- 27 Wood SN. 2003. Thin plate regression splines. *J Royal Stat Soc*. 65:95-114.

1 Wood SN. 2011. Fast stable restricted maximum likelihood and marginal likelihood estimation of  
2 semiparametric generalized linear models. *J Royal Stat Soc.* 73:3-36.

3 Wood S. 2009. Package ‘mgcv’. Retrieved on February 8, 2017, from [http://cran.r-](http://cran.r-project.org/web/packages/mgcv/mgcv.pdf)  
4 [project.org/web/packages/mgcv/mgcv.pdf](http://cran.r-project.org/web/packages/mgcv/mgcv.pdf)

5 Wiener M, Parikh A, Krakow A, Coslett HB. 2018. An Intrinsic Role of Beta Oscillations in Memory  
6 for Time Estimation. *Sci Rep.* 8:7992.

7

8

9

10

11

12

13

14

15

16

17

18

19

20

21

22

23

24

25

26

27

1 **Figures**

2

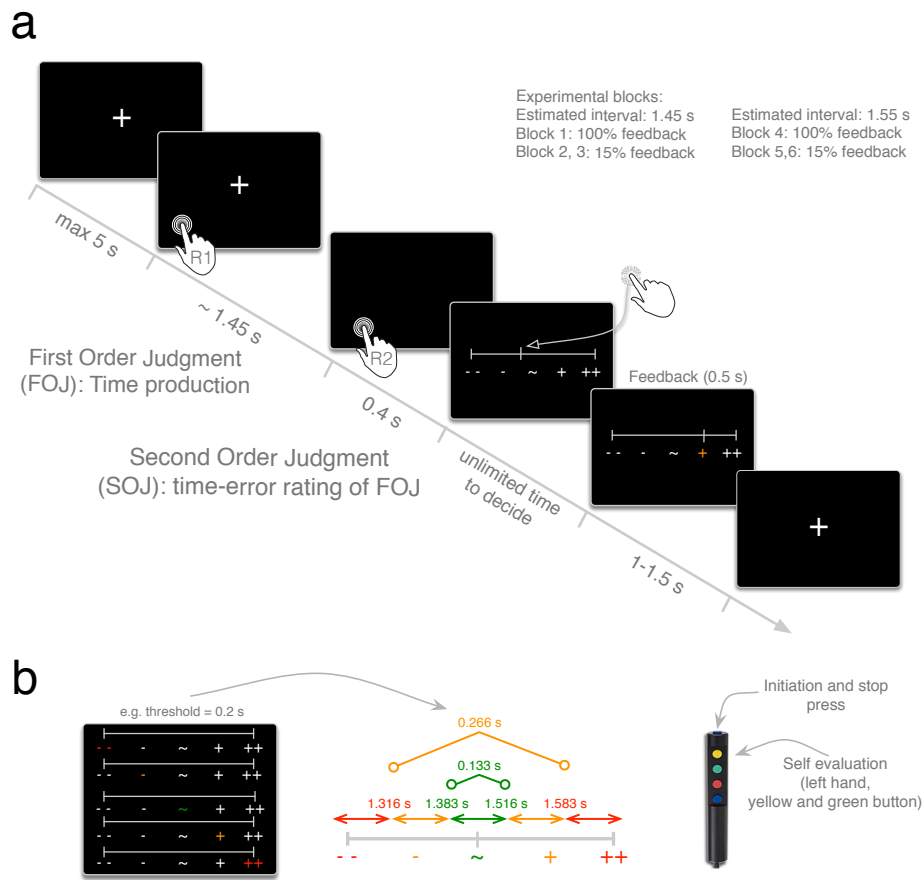

3

4 **Figure 1. Experimental paradigm in which participants produced a time interval and subsequently**

5 **estimated its signed magnitude. (a) Time course of an experimental trial. (b) Rating scale for participants' self-**

6 **evaluation and for feedback. Feedback categories were individually tailored according to an individuals' duration**

7 **discrimination threshold (green: correct; yellow: slightly shorter or longer; red: too short or too long). The**

8 **response mapping for TOJ and SOJ is provided on the right.**

9

10

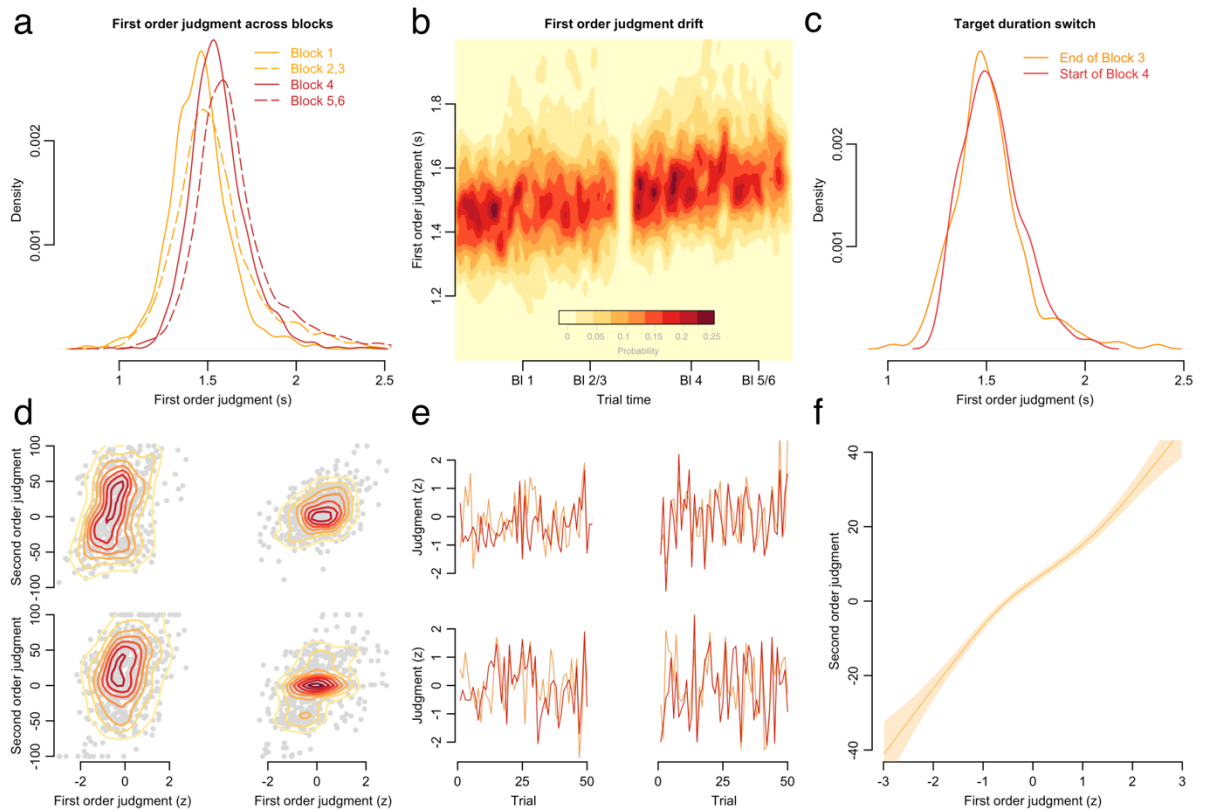

1

2 **Figure 2. Behavioral evidence for temporal production (FOJ) and participants' ability to self-evaluate the**

3 **signed magnitude of produced duration (temporal metacognition, SOJ). (a)** Probability density function of

4 all participants' time productions separately for each experimental block. Yellow is 1.45 s; red is 1.55 s. **(b)**

5 Continuous density plot of duration productions in the course of the whole experiment. Red values indicate the

6 distribution of temporal productions for all participants (n=12) throughout all experimental blocks. The yellow

7 break indicates the transition between Blocks 3 and 4. **(c)** Probability density functions of the last 10 trials in

8 Block 3 and the first 10 trials in Block 4, computed across individual trials for all participants. **(d)** Raw data of

9 four participants illustrating SOJ as a function of FOJ in a two dimensional density plot marked by the isometric

10 lines. **(e)** The four participants' first 50 experimental trials were z-scored for easier visualization: SOJ (orange)

11 tracked FOJ (red) over time. **(f)** The regression line is the GAMM model fit between SOJ and FOJ estimates for

12 all participants.

13

14

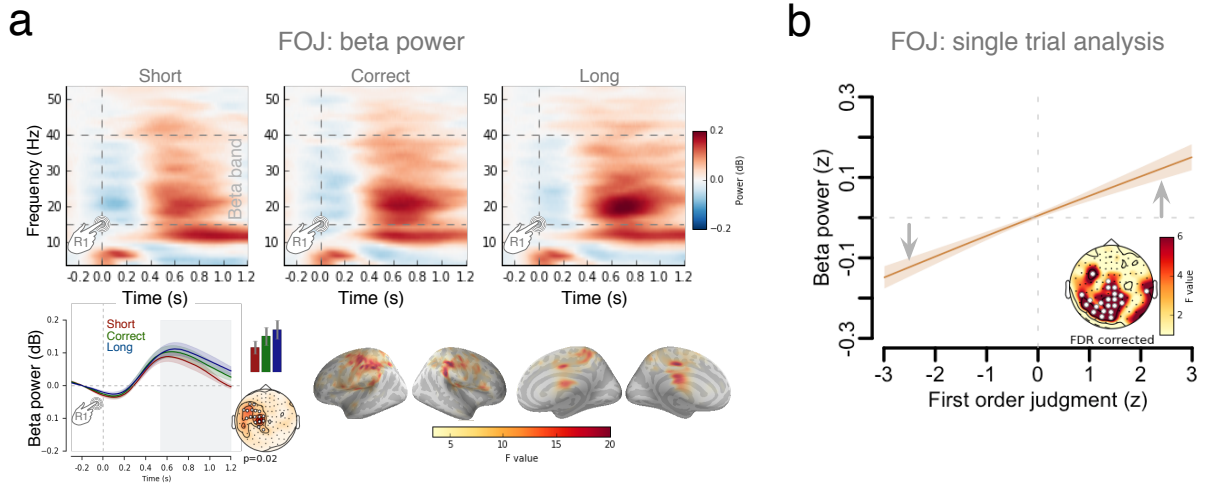

1

2 **Figure 3.  $\beta$  power as a signature of state variable, controlling produced duration (FOJ).** (a) Top: time-

3 frequency analysis during FOJ. Left bottom:  $\beta$  (15-40 Hz) power was sorted as a function of FOJ categories (red:

4 too short; green: correct; blue: too long) in the sensor with the highest F-value. The time-based cluster permutation

5 t-test for  $\beta$  power showed latencies (grayed) at which it significantly differed across FOJ categories. The bar plot

6 provides the average  $\beta$  power over significant sensors during that time window. Bars are 2 s.e.m. Right: source

7 estimates contrasting FOJ driven  $\beta$  power effects (uncorrected F-map) implicated medial and motor regions. (b)

8 Regression plot showing that  $\beta$  power covaried with FOJ (GAMM model fit). The topographical map shows the

9 distribution of significant sensors. Statistical details are in **Table S1**. The arrows indicate that the main effect was

10 driven by z-scored  $\beta$  values, which significantly differed from their mean value.

11

12

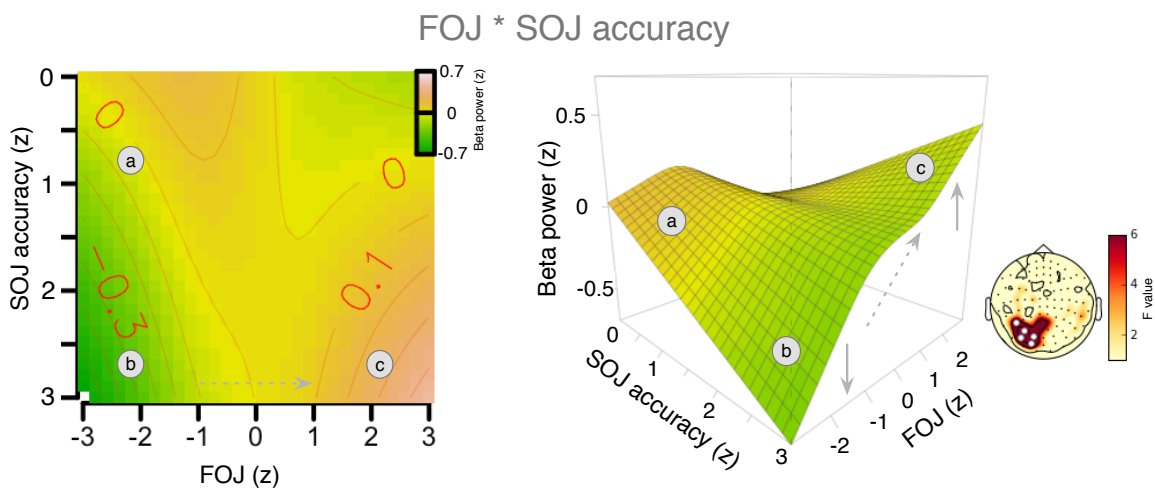

13

1 **Figure 4.  $\beta$  power is used for metacognitive evaluation.** Outcomes of the GAMM model fit for the interaction  
2 term between FOJ and SOJ accuracy. The analysis of SOJ accuracy scores indicated that  $\beta$  power was a strong  
3 predictor of FOJ but mostly when SOJ were accurate. The 3D plot and the heat map term illustrate that for high  
4 SOJ accuracy scores, the power of  $\beta$  oscillations strongly predicted the FOJ. This effect could be seen as an  
5 increase of  $\beta$  power from ‘b’ to ‘c’ in the ‘accurate’ part of the surface (**left panel**), indicating that when  
6 participants correctly self-estimated their temporal production,  $\beta$  power was also predictive of FOJ. As the SOJ  
7 accuracy score decreased towards ‘a’, the predictive power of  $\beta$  for FOJ also decreased. Statistical details in **Table**  
8 **S2.**  
9  
10

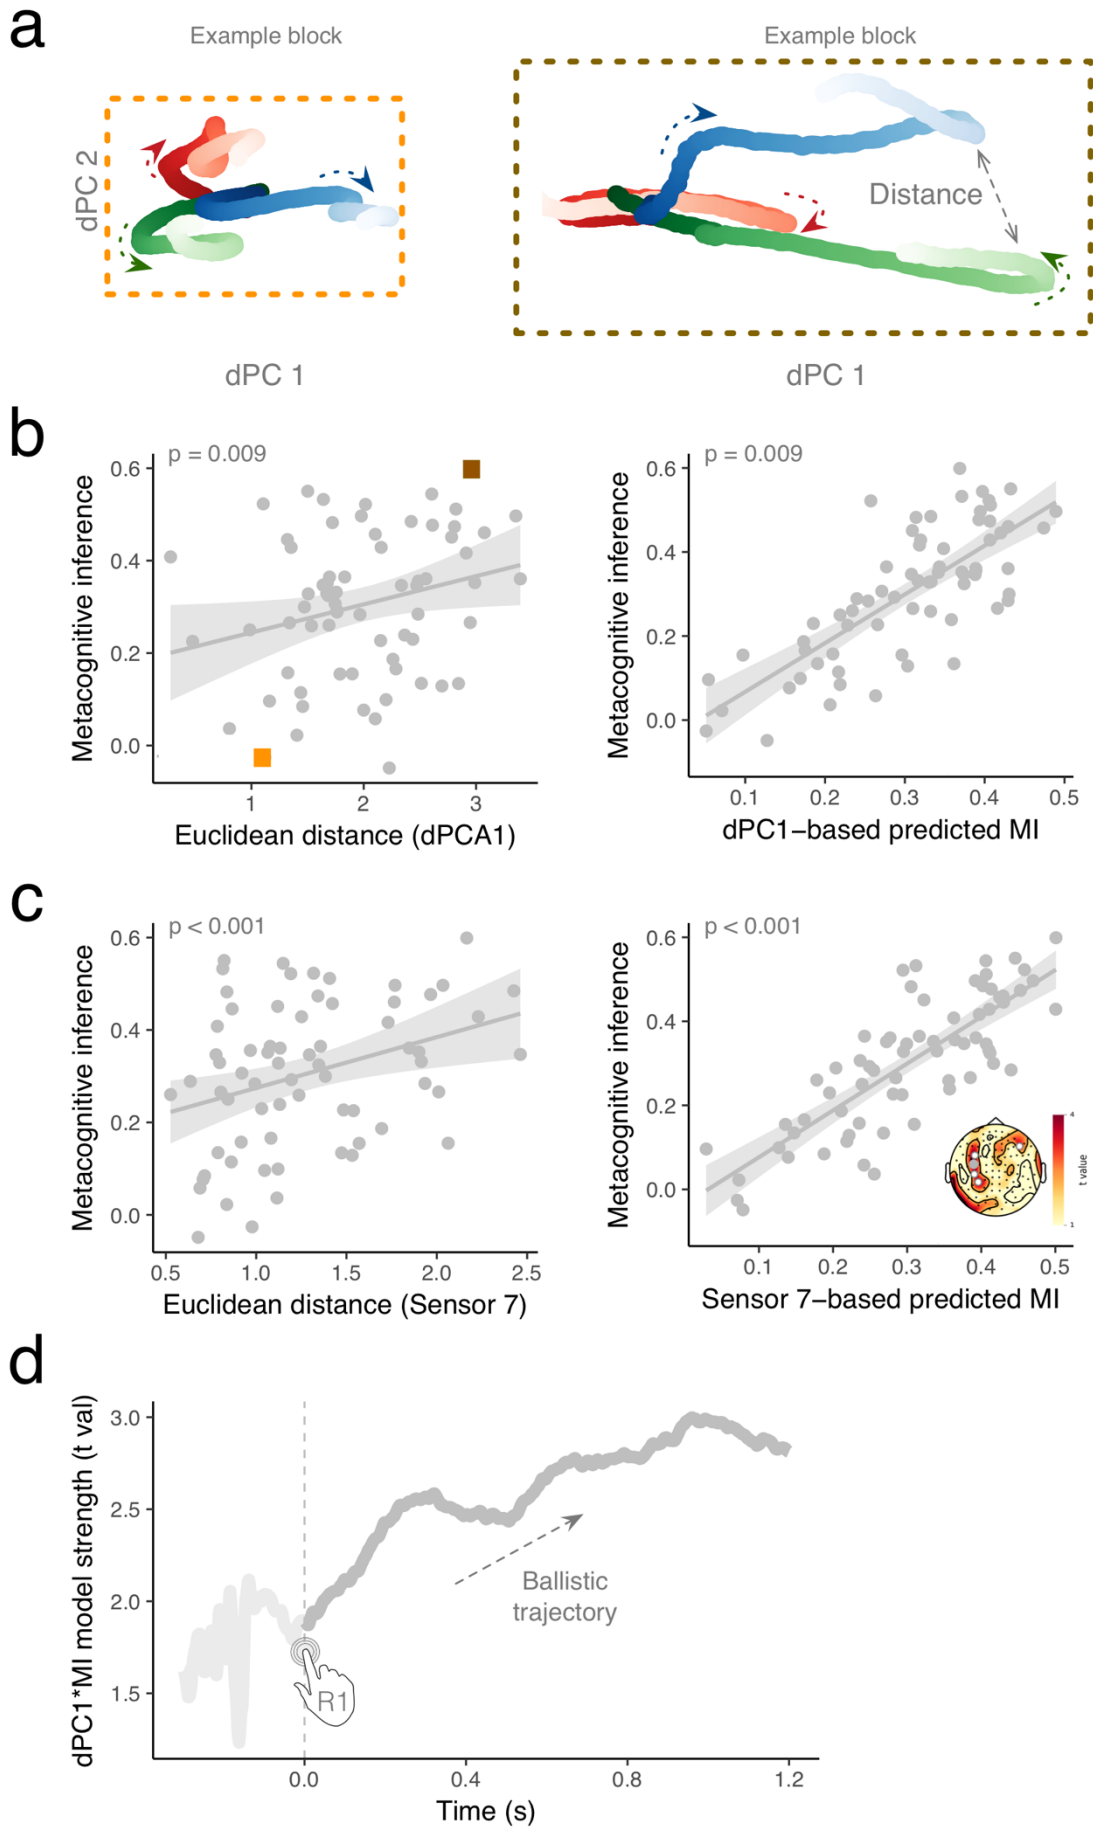

1 **Figure 5. Distance in  $\beta$  state space supports metacognitive inference.** (a) dPCA decomposition in  $\beta$  band (-0.3  
2 to 1.2 with respect to R1) illustrated for two blocks with low and high metacognitive performance, respectively.  
3 The two first dPCs are displayed against each other, and illustrate an early separation of path trajectory. Arrows  
4 indicate the progression of  $\beta$  state along the arrow of time. (b) The left panel illustrates the significant results of  
5 a single trial like analysis in which a linear mixed model was used to predict the level of metacognitive inference  
6 (FOJ\*SOJ) on the basis of a distance in  $\beta$  state space (dPC1) on within participant basis. One dot is a block  
7 within participant. Orange and grey rectangles correspond to trajectories reported in (a) for two blocks with a low  
8 and a high metacognitive inference ability, respectively. The right panel illustrates empirical values of  
9 metacognitive inference plotted against the values predicted by the model. (c) The left panel illustrates the  
10 significant outcome for the same analysis performed on individual sensor (here, one dot is one block, one sensor).  
11 The right panel illustrates empirical values of metacognitive inference plotted against the values predicted by the  
12 model. The topographical map displays t values together with significant sensors marked as white. The grey sensor  
13 is the one displayed in the scatterplot. (d) Time course of the linear model predicting metacognitive inference on  
14 the basis of distance in  $\beta$  state space (dPC1). The distance in state space is predictive of metacognitive inference  
15 early in the onset of the production interval and continues to increase throughout the interval.

16

17

18

19

20



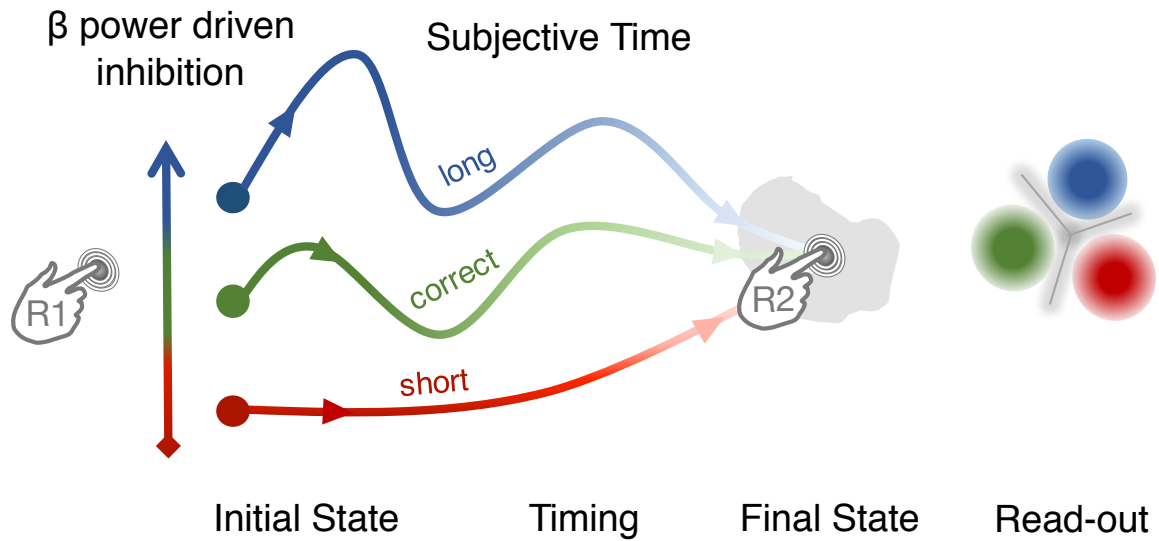

1

2 **Figure 6. Synthetic view of the proposed role of  $\beta$  oscillations in timing and temporal metacognition.** The  $\beta$   
3 power at the onset of the interval determines a network trajectory set by the initial level of inhibition in the network  
4 (increasing  $\beta$  power as network inhibition from red to blue). The initial network state and subsequent trajectory  
5 determines the motor timing goal. The separation of network trajectories allows reading out the network state  
6 associated with a certain motor timing goal.

7

8

9

10

11

12

13

14

15

16

17

18

19

## 1 SUPPLEMENTAL FIGURES

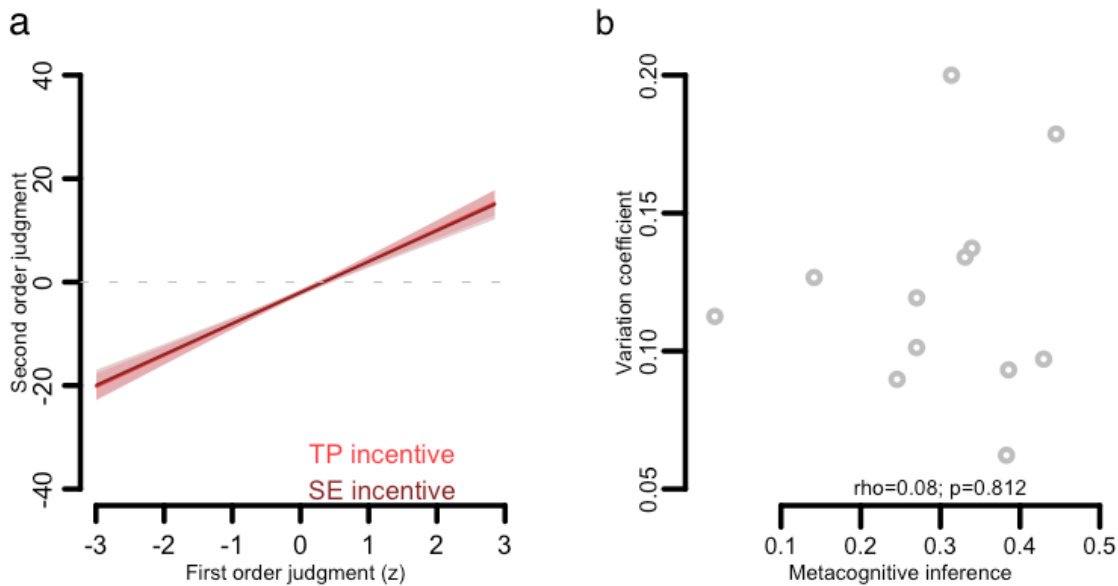

2  
3 **Figure S1. Participants solely relied on temporal representation for their SOJ.** (a) An additional scenario  
4 accounting for the interaction between FOJ and SOJ was that participants intentionally increased the variance of  
5 their FOJ to improve their SOJ. This cognitive strategy would confound the possibility of an internal state variable  
6 being monitored, and this possibility was also not controlled for in previous work (Akdogan & Balci, 2017). To  
7 address this important issue, we performed a control experiment in which we manipulated the incentives:  
8 participants produced 1.45 s durations, and received points for their FOJ accuracy in one block or for the  
9 congruence between their FOJ and their SOJ in another block. If participants used the confounding cognitive  
10 strategy described above, the regression slope for FOJ and SOJ would have been significantly larger in the  
11 congruence incentive condition than in the FOJ accuracy incentive condition. In this control experiment, the FOJ  
12 significantly covaried with SOJ ( $F(1.0) = 91.9$ ,  $edf = 1.0$ ,  $p < 10^{-15}$ ) just as we observed in our main experimental  
13 design. Most importantly, the addition of the block type factor was not justified in the model ( $\Delta AIC = 0.9$ ,  $\chi^2(1)$   
14  $= 0.6$ ,  $p = 0.79$ ), demonstrating that participants performed the task sequentially by first estimating FOJ and then  
15 estimating SOJ without alternative cognitive strategies. To further strengthen the observations in the control  
16 experiment, we checked whether the spread of FOJ estimations could account for an individual's metacognitive  
17 inference. Individual differences in metacognitive inference (FOJ\*SOJ) were not correlated with the individuals'  
18 coefficient of variation observed in FOJ ( $\rho = 0.08$ ;  $p = 0.81$ ). This observation did not support the idea that  
19 participants boost their FOJ and SOJ correlation, but rather that participants effectively complied with the original  
20 task goal of inferring the signed magnitude of their temporal errors following their temporal productions.

21 Participants did not modulate their responses based on changes of incentives. The plot depicts behavioral  
22 data in the control psychophysical experiment and illustrates the strong link between FOJ and SOJ. Regression  
23 lines depict the model fit between the observed SOJ and FOJ estimates for a block with incentive for FOJ (dark  
24 red) and another block with an incentive on congruence between FOJ and SOJ (light red). We found no evidence  
25 supporting the hypothesis that incentive manipulation impacted SOJ, suggesting that participants in the main task  
26 did not use any strategies when performing SOJ.

27 In the incentive for FOJ block, participants received 2 points for a “green” feedback and 1 point for an  
28 “orange” feedback. In the incentive for SOJ accuracy block, the distance between FOJ and SOJ category was  
29 computed. Participants were given points on each trial according to this distance: the SOJ category boundaries  
30 were arbitrary set to -60, -30, +30, and +60 points on the self-evaluation scale. Specifically, when FOJ and SOJ  
31 landed in the same category, participants received 2 points; they received 1 point when they landed in adjacent  
32 categories; and 0 points when categories were different. Ten participants took part in the experiment with two  
33 blocks of 100 trials. The perceptual threshold for duration production on the basis of which the feedback ranges  
34 were established in the main experiment, was set to 0.2 for all participants. Participants received feedback in 100%  
35 of trials. All other aspects of the control experiment were identical to the main experiment. (b) The spread of FOJ  
36 was not related to metacognitive inference. The plot illustrates coefficient of variation over FOJ plotted against  
37 metacognitive inference quantified as Spearman's correlation between FOJ and SOJ.

38  
39

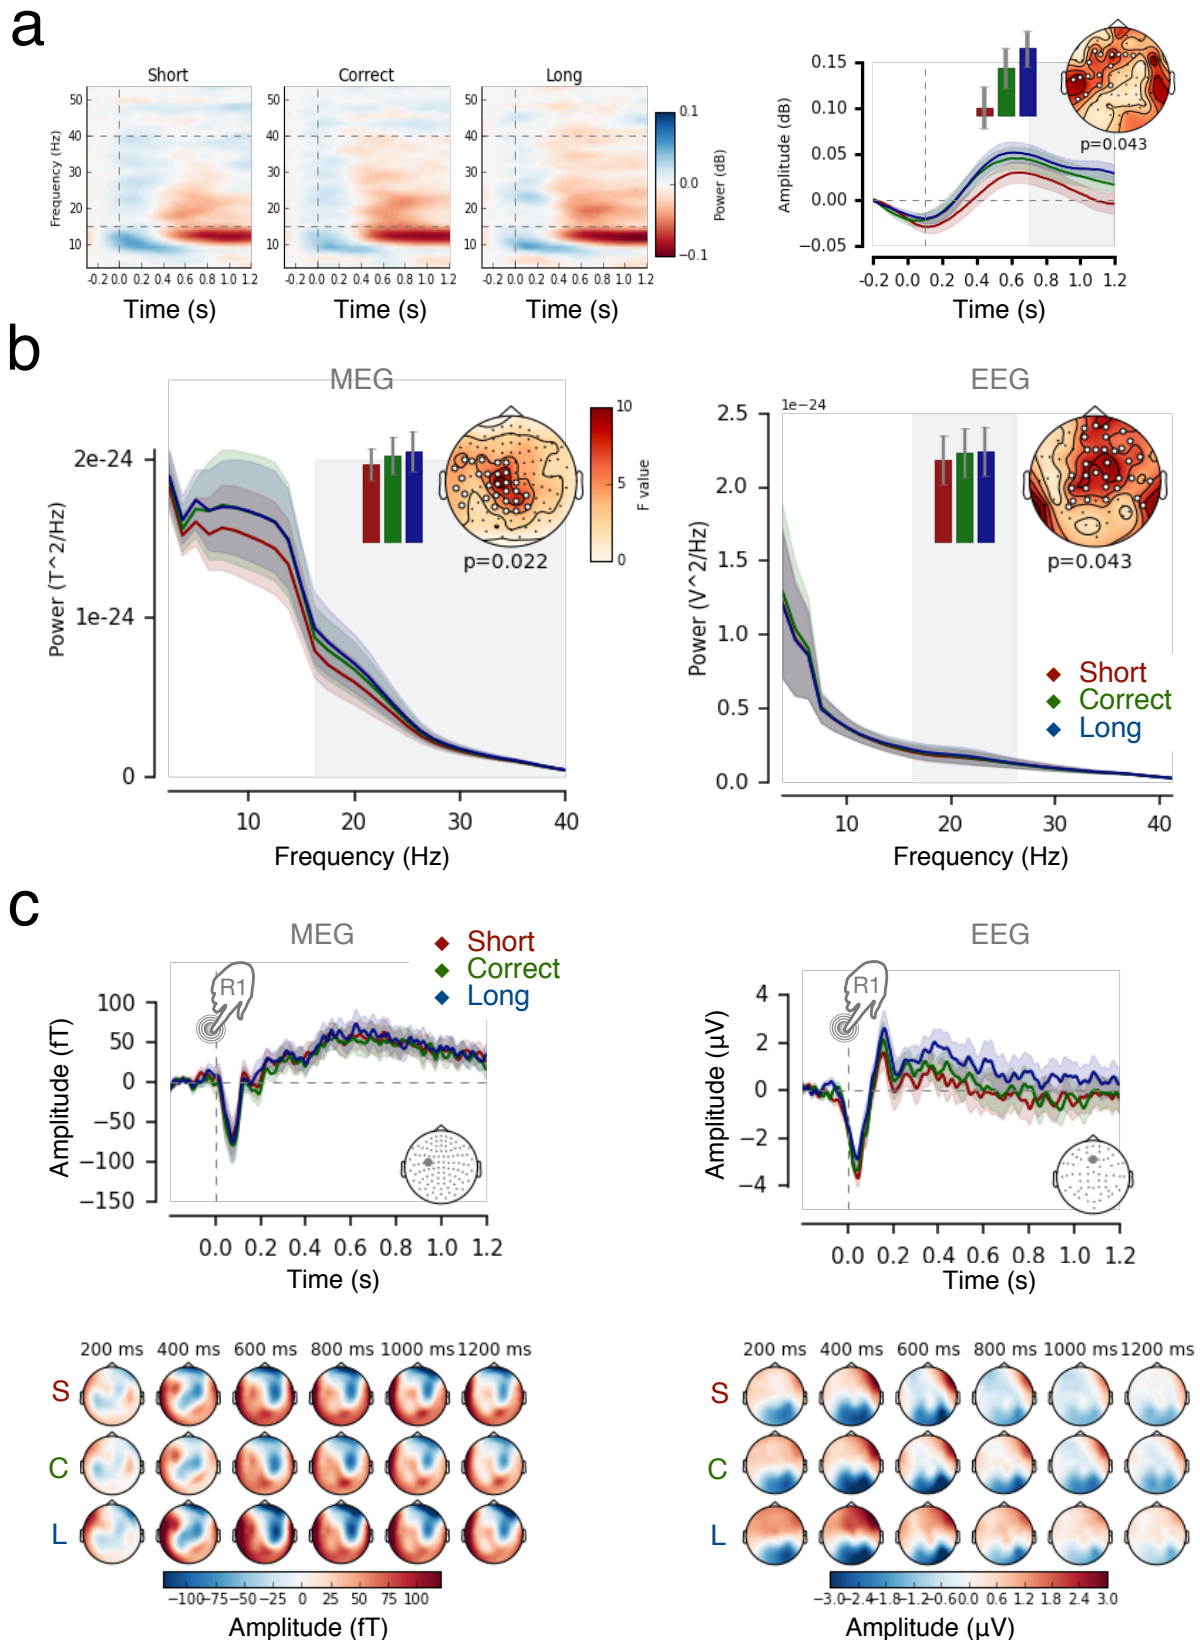

1  
2  
3  
4  
5  
6

**Figure S2.  $\beta$  power, not slow brain activity, controls FOJ.** (a) We explored the association of slow activity (Contingent Negative Variation, CNV (Kononowicz & Penney, 2016; Macar & Vidal, 2004) with ‘too short’, ‘correct’ and ‘too long’ categories of FOJ. Using data between 0.4 and 1.2 s following the first button press, we found no significant differences in the amplitude of the slow evoked responses as a function of duration estimation (all  $p > 0.1$ ). This replicated previous work discussing the functional implication of slow activity in timing

1 (Kononowicz & Van Rijn, 2011; 2014). Evoked related fields/potentials (ERF/P) following the first keypress  
 2 showed no significant effects as a function of FOJ in MEG or EEG (left and right panel, respectively). (b) The  
 3 same time-frequency analysis in the same frequencies as those used for MEG analysis (15-40 Hz) confirmed the  
 4 main MEG observations, showing that larger values of  $\beta$  power yield longer duration productions. (c) Power  
 5 Spectrum Density (PSD) of MEG activity as a function of FOJ. Cluster-based permutation F-test on PSD estimates  
 6 in the frequency dimension showed significant  $\beta$  (15-40 Hz) power increases as a function of longer duration  
 7 productions in both MEG and EEG. The vertical grey area demarcates the significant frequency range. The  
 8 topographical plot illustrates the distribution of sensors included in the cluster. The barplot shows the averaged  
 9 value in the significant region for all three FOJ conditions in the most significant sensor. EEG analysis, depicted  
 10 in the right panel, confirmed observations obtained with MEG PSD spectrum for the example electrode.  
 11  
 12

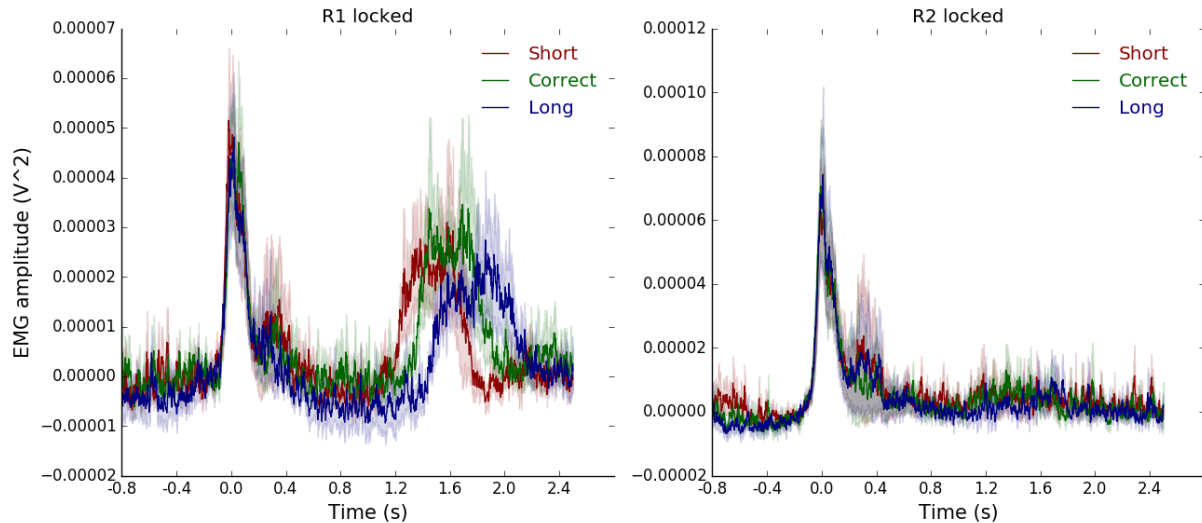

13  
 14 **Figure S3. Muscular activity did not impact FOJ.** Both panels depict electromyographic (EMG)  
 15 data were split as a function of FOJ performance and time-locked to the first keypress. Differences across time  
 16 production performances were tested using a one-way non-parametric Friedman's ANOVA in the 0 to 0.8 s time  
 17 window following the first keypress with non-overlapping time windows of 0.1 s. We found no significant  
 18 differences (R1-locked, all  $p > 0.1$ ). The same analysis following the second keypress showed no significant  
 19 differences between conditions (R2-locked, all  $p > 0.1$ ). Overall, we found no evidence suggesting that motor  
 20 activity could be a confounding factor for the main M/EEG findings.  
 21  
 22

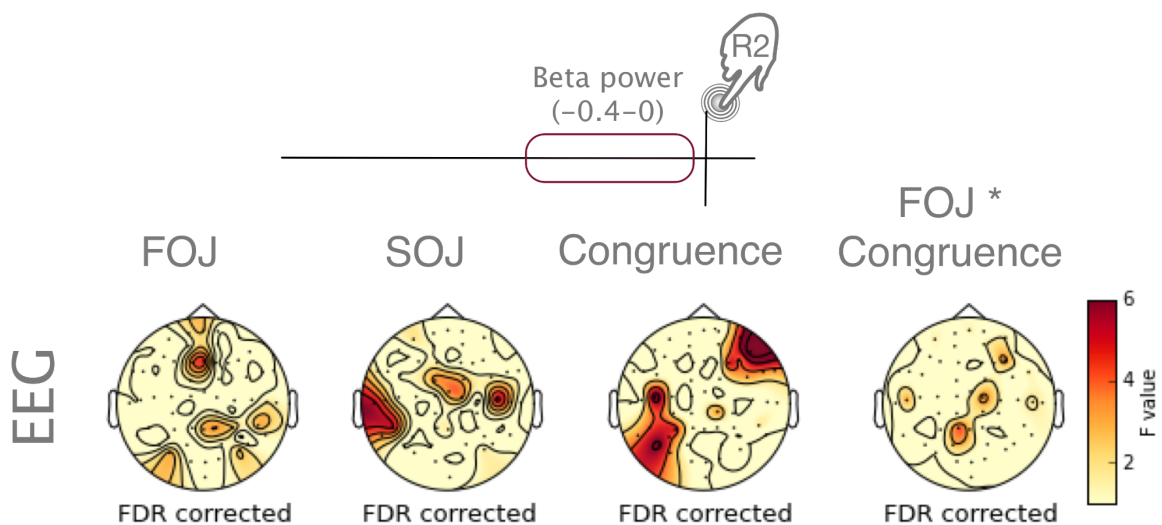

23  
 24 **Figure S4. GAMM model fits computed for  $\beta$  power in the 0.4 s time window preceding the second keypress.**  
 25 The topographical maps show that no significant effects were found, suggesting that the second key press was  
 26 executed after  $\beta$  power reached a certain fixed level.  
 27

1

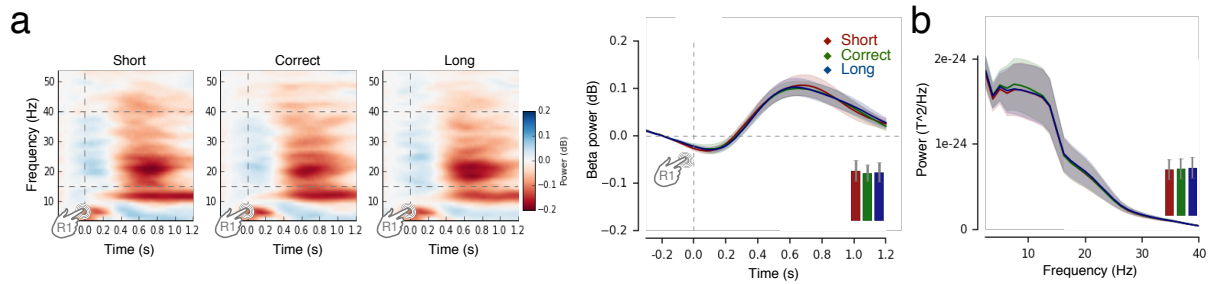

2

3

4

5

6

7

8

9

10

11

12

**Figure S5. (a)** Time-frequency spectrum for the same MEG sensor as was used for the analysis based on the FOJ split. The  $\beta$  band is marked by horizontal grey lines. The results of cluster-based permutation F-test performed over time did not show any differences. No significant clusters were found (all  $p > 0.1$ ). The barplot displays SOJ driven data using the same parameters as in FOJ driven condition. **(b)** The same SOJ based analysis for PSD values. Again MEG results of cluster-based permutation F-test of PSD estimates as a function of SOJ showed no effects in any frequency band. No significant clusters were also present for analogical analyses based on EEG data (all  $p > 0.1$ )

13

14

15

16

17

18

19

20

21

22

23

24

25

26

27

28

29

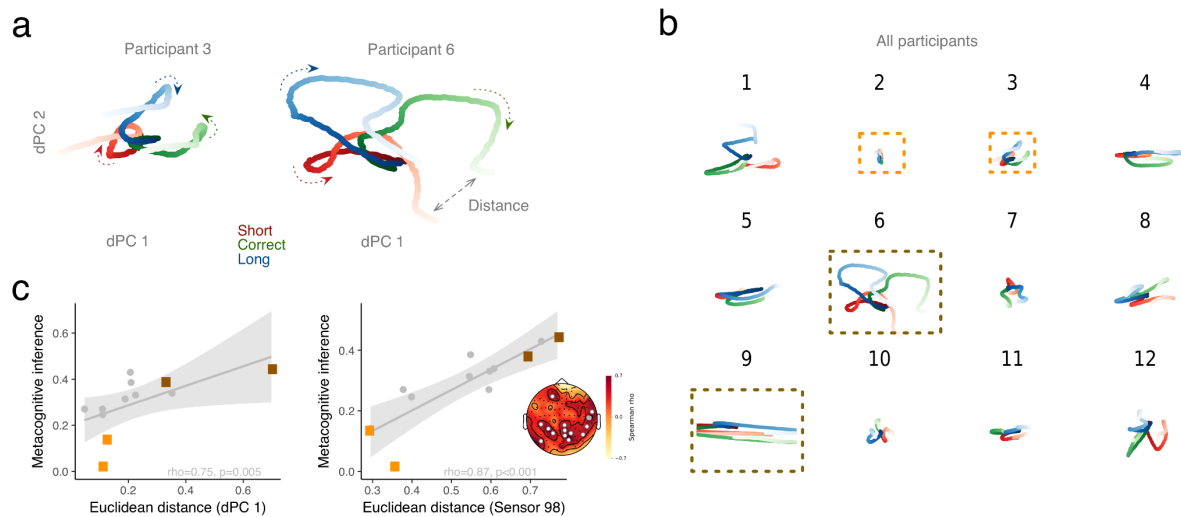

30

31

32

33

34

35

36

37

38

39

40

41

42

43

44

45

46

47

48

49

50

**Figure S6. Distance in  $\beta$  state space supports metacognitive inference.** **(a)** dPCA decomposition in  $\beta$  band (-0.3 to 1.2 with respect to R1) illustrated for two participants with low and high metacognitive performance, respectively. The two first dPCs are displayed against each other, and illustrate an early separation of path trajectory. Arrows indicate the progression of  $\beta$  state along the arrow of time. **(b)** Individual outcomes of dPCA analyses. For each participant, dPC1 was plotted against dPC2. The dark and light orange frames indicate participants with good and bad levels of metacognitive inference, respectively. **(c)** The left panel illustrates the significant correlation between individual distances in  $\beta$  state space (dPC1) and metacognitive inference (FOJ\*SOJ) in all participants. One dot is a participant. Light and dark orange rectangles correspond to trajectories reported in (a) for two participants with a low and a high metacognitive inference ability, respectively. The right panel illustrates the significant outcome for the same analysis performed on individuals' sensor (here, one dot is one individual, one sensor). The topographical map displays  $\rho$  values together with significant sensors marked as white. The grey sensor is the one displayed in the scatterplot.

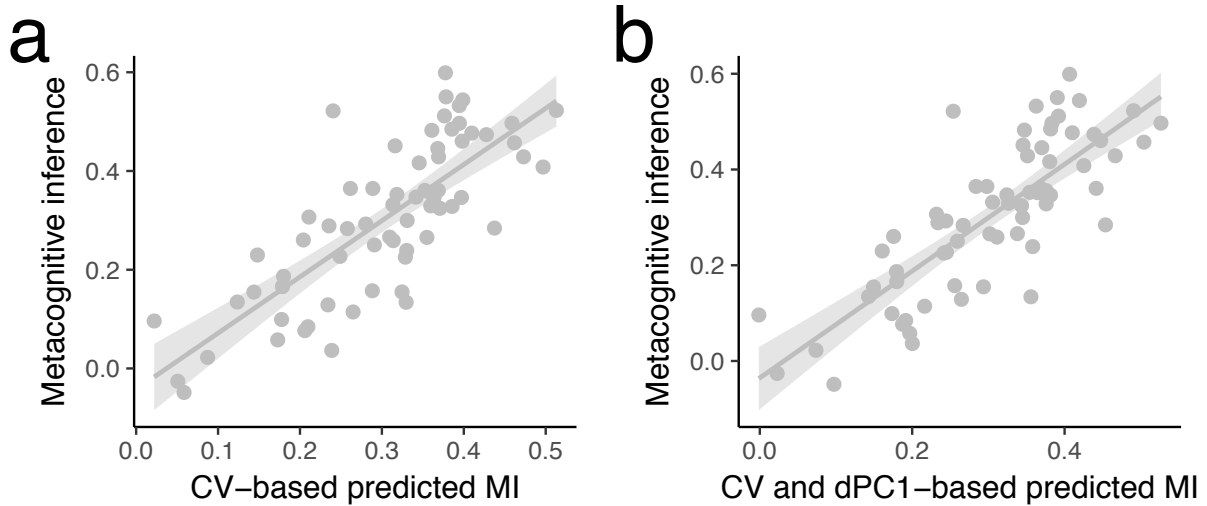

1  
 2 **Figure S7.  $\beta$  state-space was not driven by Coefficient of Variation (CV) (Analysis per block)** (a) A single  
 3 trial analysis in which a linear mixed model was used to predict the level of metacognitive inference (FOJ\*SOJ)  
 4 on the basis of a Coefficient of Variation. We tested the role of behavioral fluctuations in performance precision  
 5 for metacognitive inference. We assessed whether fluctuations of precision (CV) within participants contributed  
 6 to the model where the distance in  $\beta$  state-space (dPC1) predicted metacognitive inference. (b) A single trial  
 7 analysis in which a linear mixed model was used to predict the level of metacognitive inference (FOJ\*SOJ)  
 8 on the basis of a Coefficient of Variation and dPC1. We found that the addition of the precision to the model was  
 9 justified [ $\Delta AIC = 7$ ,  $p = 0.003$ ] but could not explain away all the variance as both factors of  $\beta$  state space distance  
 10 (dPC1;  $t(63) = 2.5$ ,  $p = 0.014$ ) and precision (CV;  $t(65) = 3.1$ ,  $p = 0.003$ ) were significantly contributing to the  
 11 model. The lack of correlation supported the results of our control experiment suggesting that participant did not  
 12 intentionally increased their behavioral variance. Instead, the within-subject effect was indicative of the properties  
 13 of internal variables. Therefore, our results bring an interesting consideration that precision on a given block may  
 14 have contributed to the metacognitive performance, suggesting that participants tracked the properties of  
 15 endogenous timing uncertainties (Balci et al., 2009). The parameters of internal noise could contribute to  
 16 metacognitive performance, which should be closer investigated in future studies.

18

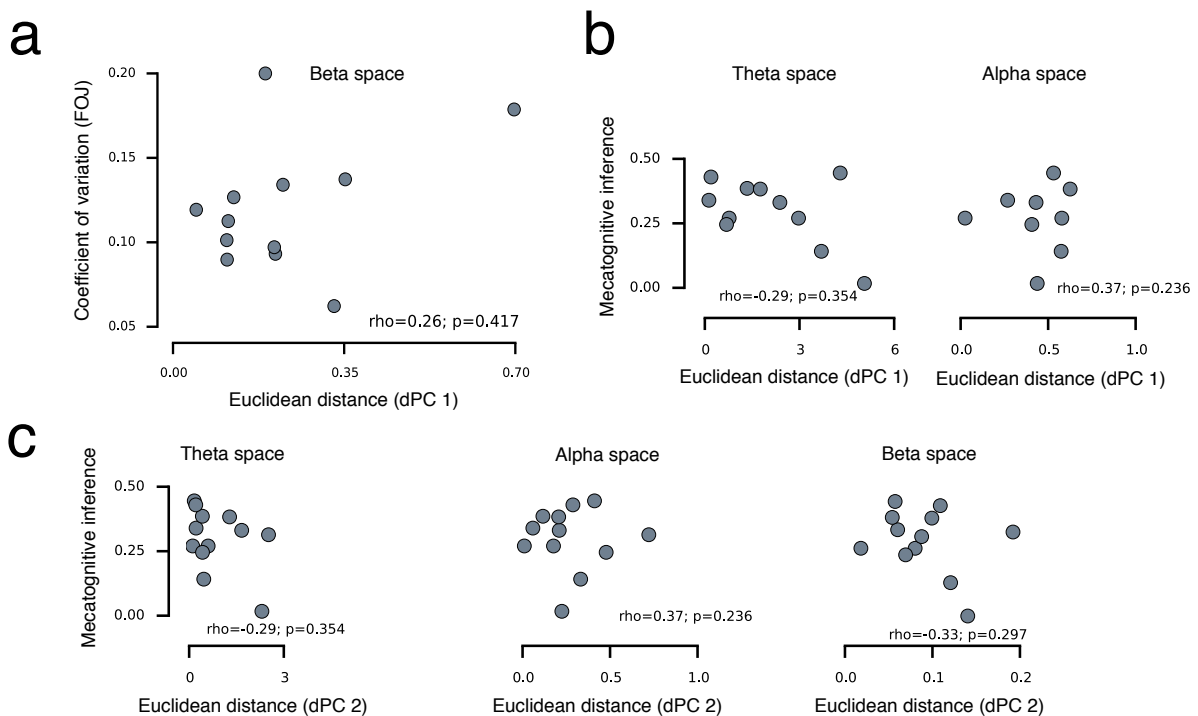

19



1  
2  
3  
4  
5  
6  
7  
8  
9  
10  
11  
12  
13  
14  
15  
16  
17  
18  
  
19  
  
20  
  
21  
  
22  
  
23  
  
24  
  
25  
  
26  
  
27  
  
28  
  
29  
  
30  
  
31  
  
32  
  
33  
  
34  
  
35  
  
36  
  
37  
  
38  
  
39

**Figure S8.  $\beta$  state-space was not driven by Coefficient of Variation (CV) (Analysis per participant) (a)** Individual distances in  $\beta$  state space (dPC 1) plotted against individual spread of FOJ (coefficient of variation). The multidimensional distance in  $\beta$  state-space was not driven by the spread of individual FOJ responses as quantified by their Coefficient of Variation (CV-FOJ; standard deviation of an individual's FOJ divided by its mean) ( $\rho = 0.26, p = 0.42$ ). To insure that there was no confounds with behavioral variance in CV-FOJ, we computed robust linear regressions: a comparison of the null model to the model containing  $\beta$  power was justified ( $F_{\text{robust}} = 8.0, p = 0.004$ ) whereas the inclusion of CV-FOJ against the null model was not warranted ( $F_{\text{robust}} = 0.03, p = 0.9$ ). This demonstrated that including the CV-FOJ did not significantly account for the variance in the model. CV-FOJ and dPC1 were also dissociated as the model containing CV-FOJ and dPC1 was preferred over the model containing only CV ( $F_{\text{robust}} = 7.3, p = 0.006$ ). The dissociation between CV-FOJ and dPC1 showed that the distance in  $\beta$  state-space was not solely driven by inter-individual variability in FOJ, further precluding the possibility that participants might have intentionally increase CV to obtain a better metacognitive performance. **(b)** Individual distances in theta and alpha state spaces (dPC 1) plotted against metacognitive inference (FOJ\*SOJ). Although, we specifically hypothesized about  $\beta$ , we also insured that no other frequency bands or components were significant (all  $p > 0.1$ ). **(c)** Individual distances in theta, alpha, and  $\beta$  state spaces (dPC 2) plotted against metacognitive inference.

1 **SUPPLEMENTAL TABLES**

2  
3

| A. parametric coefficients | Estimate | Std. Error | t-value | p-value  |
|----------------------------|----------|------------|---------|----------|
| (Intercept)                | 0.0008   | 0.0063     | 0.1346  | 0.8929   |
| B. smooth terms            | edf      | Ref.df     | F-value | p-value  |
| s(FOJ)                     | 1.0000   | 1.0001     | 26.5169 | < 0.0001 |
| s(SOJ)                     | 1.0001   | 1.0002     | 0.0199  | 0.8877   |
| s(SOJ accuracy)            | 1.0001   | 1.0002     | 6.4454  | 0.0111   |
| ti(FOJ * SOJ)              | 1.5884   | 1.9788     | 0.8339  | 0.4507   |
| ti(FOJ * SOJ accuracy)     | 1.0044   | 1.0088     | 8.0907  | 0.0044   |
| s(subject)                 | 0.0006   | 11.0000    | 0.0000  | 1.0000   |

GAMM analysis: R1-locked  $\beta$  power, FOJ cluster

4  
5  
6  
7  
8  
9  
10

**Table S1.** The results of single-trial GAMM analysis based on  $\beta$  power following the first keypress (R1). The table displays the results for the final model, which was based on the data collapsed across the significant sensors, showing the main effect of FOJ, when the model was fitted on a per sensor basis.

| A. parametric coefficients | Estimate | Std. Error | t-value | p-value  |
|----------------------------|----------|------------|---------|----------|
| (Intercept)                | 0.0012   | 0.0093     | 0.1274  | 0.8986   |
| B. smooth terms            | edf      | Ref.df     | F-value | p-value  |
| s(FOJ)                     | 3.9387   | 5.0159     | 5.0553  | 0.0001   |
| s(SOJ)                     | 1.0000   | 1.0001     | 15.0954 | 0.0001   |
| s(SOJ accuracy)            | 1.0001   | 1.0002     | 1.1390  | 0.2859   |
| ti(SOJ * FOJ)              | 2.2156   | 2.7321     | 1.2167  | 0.4324   |
| ti(FOJ * SOJ accuracy)     | 1.0018   | 1.0036     | 17.0089 | < 0.0001 |
| s(subject)                 | 0.0010   | 11.0000    | 0.0000  | 1.0000   |

GAMM analysis: R1-locked  $\beta$  power, FOJ \* SOJ accuracy cluster

11  
12  
13  
14  
15  
16

**Table S2.** The results of single-trial GAMM analysis based on  $\beta$  power following the first keypress (R1). The table displays the results for the final model which was based on the data collapsed across the significant sensors, showing the interaction effect between FOJ and SOJ accuracy, when the model was fitted on a per sensor basis.
